# Supplementary material for: Deep Conservation of Hid-Like RHG Gene Family Homologs in Winged Insects Revealed by “Taxon Hopping” BLAST
Source: MDPI journal article supplement (doi:10.3390/insects12110957), 2021-10-21
Supplement: s1 [file s1]

|                     |                                                             |    |
|---------------------|-------------------------------------------------------------|----|
| Cpip_D_XP_039434833 | MAIPFLQPEDDDAARLQHAAT---QSGPPTLG---PVSP-----                | 33 |
| Aead_D_XP_029727134 | MAIPFLQPEEDSARHHGANG---PNTASAHA---GVGAGAGSSGTGSASASGSGAVVVG | 54 |
| Bcop_D_XP_037040268 | MAVPFYVPDEE--RENG-----                                      | 15 |
| Bcop_D_XP_037050104 | MAVPFFVPDGDQRSNG-----                                       | 17 |
| Cnas_D_XP_031624166 | MAVGFFADDGDDHL-----                                         | 14 |
| Dmel_hid            | MAVPFYLPEGGADDVASSSSGASGNSSPHNHPLSSASSSVSSSGVSSASASSASSS--- | 57 |
| Hill_D_XP_037904604 | MAVPFYLPNQDEQGA-----                                        | 15 |
| Bdor_D_AHX71830     | MAVVFMPEGGDDDSASSSSGGHGSAG-----                             | 27 |
| Asus_D_AEF30451     | MAVVFMPEAGADDSASSSSGSHGSGG-----                             | 27 |
| Ccap_D_JAB92755     | MAVVFMPEGGDDTASSSSGGHSSTG-----                              | 27 |
| Msca_D_APT68153     | MAVPFYMPNQEDGD-----                                         | 14 |
| Lser_D_AKA64736     | MAVPFYLPEGGADDTVSS-GGTTSSDG-----                            | 26 |
| Gfus_D_XP_037879387 | MAVPFYLPEGGADDTVAS-AAGLASDG-----                            | 26 |

\*\* : \*

|                     |                                                              |     |
|---------------------|--------------------------------------------------------------|-----|
| Cpip_D_XP_039434833 | GPGSSGGPLLHPPPSPLVSGSIPIPGSPAPIGVPPPPPSGTSTAVQTPLLGPAGLMHGDQ | 93  |
| Aead_D_XP_029727134 | GAGSSGGAVMLA---GATGMPVPNSPA---APIISSGTSTAVQTPLIGP---MNSDQ    | 103 |
| Bcop_D_XP_037040268 | -----SSSQPQSTTTSATQTPLQSPTN---EH                             | 39  |
| Bcop_D_XP_037050104 | -----STPQSQSTISSATQTPLQSPVN---DEH                            | 42  |
| Cnas_D_XP_031624166 | -----NSSYHTTVITTN SATQTPLQSPVS---HEY                         | 41  |
| Dmel_hid            | SSASSDG-----ASSAASQSPNTTTSSATQTPMQSPLP-T--DQ                 | 93  |
| Hill_D_XP_037904604 | ---SGS-----SGSSTGSSPN-TTTSATQTPLPSPAP-VNGEQ                  | 48  |
| Bdor_D_AHX71830     | ---SGS-----AASSTSQSPN-TTTSATQTPMQSPLP---PHF                  | 58  |
| Asus_D_AEF30451     | ---SGS-----AASSTSQSPN-TTTSATQTPMQSPLM---ASP                  | 58  |
| Ccap_D_JAB92755     | ---SGS-----AASSTSQSPN-TTTSATQTPMQSPLV---PNP                  | 58  |
| Msca_D_APT68153     | -----GSSSSSQSPN-TSTSATQTPLQSPVT---GEY                        | 42  |
| Lser_D_AKA64736     | ---ASS-----AASSLQSSPN-TTSSATQTPMQSPLL---PGE                  | 57  |
| Gfus_D_XP_037879387 | ---TGS-----TSSSSQSSPN-TTSSATQTPIQSPLV---PGD                  | 57  |

.\*.\*\*\*: .\*

|                     |                                                              |     |
|---------------------|--------------------------------------------------------------|-----|
| Cpip_D_XP_039434833 | LVQLFYEALYRYSRGDTP-STPISQ--SPQSSSCSPFTTGYNTTPP-----GGQ       | 139 |
| Aead_D_XP_029727134 | LVQLFYEALYRYSRGDTP-STPISQ--SPQSSSCSPFTTGYNSGGGSAGYANATTTGQ   | 160 |
| Bcop_D_XP_037040268 | LVQVFYEALSLYSASLVL-RSPCS-TSPSSPSCCHPHINN-----YRGN            | 82  |
| Bcop_D_XP_037050104 | LVQAFYEALSLYSANLLQ-ATPAC-LSPPSSPSCCHRH-NN-----YRGD           | 84  |
| Cnas_D_XP_031624166 | LVQAFCEALHRCS----IAGSPGIQSVPP-SPSCSHP-----NGHGE              | 78  |
| Dmel_hid            | VLYALYEWVRM--YQSQQSAPQIFQYPPP-SPSCNFT-----GGD                | 130 |
| Hill_D_XP_037904604 | LVQAFMEVLRYCSSSTSNGGSPGFQFPPP-SPSCNLNSPGGF-----YSDE          | 93  |
| Bdor_D_AHX71830     | MMA-----FYQ-----YMNATAFQYPPASPCCQVHSPSPYTGSGGGGGGGGAGVGNGE   | 107 |
| Asus_D_AEF30451     | HIVMALCEAVYQS----LNNTPAFQYPPASPCCVHSPSPYTGSG--GG-----GGE     | 104 |
| Ccap_D_JAB92755     | YMVALCEALLYQS----MNNPPAFQYPPASPCCPVHSPSPFTGGSVGGA-----NGE    | 107 |
| MscA_D_APT68153     | LVQAICEALHRCS-----GSYPSPSCSVHSPCYN-----GGD                   | 75  |
| Lser_D_AKA64736     | VIMAIYEL---IRY---NSGAPVFQYPTPPSPSCSIHGPSYT-----GGE           | 96  |
| Gfus_D_XP_037879387 | LVMAFCEAFYRYSI---NSGAPVFQYPTPQSPSCSVHSPSYV-----GGD           | 99  |
|                     | : * * . *                                                    | ..: |
|                     |                                                              |     |
| Cpip_D_XP_039434833 | VFFPQT---PSGVLPPRTPNATGGGGRGGARIFFGQP--TPSPSGSSSYSSSQHSANSPD | 194 |
| Aead_D_XP_029727134 | VFFPQT---PNGVFRPGGGGGIGSYGATTGVFFGQPP-TPSPSGSS--SHSQHSANSPD  | 214 |
| Bcop_D_XP_037040268 | VFFPRP-----HVAPQTPVSFG---R-----                              | 100 |
| Bcop_D_XP_037050104 | VFFPQT-----NSSPRTPSASD---T-----                              | 102 |
| Cnas_D_XP_031624166 | VFFPRGSNSSNGSGSSSTPS-----                                    | 98  |
| Dmel_hid            | VFFPHGHPNPNNSNPHRTPRTSVSFSSGEEYNFFRQQQPQPHPSY---PA--PSTPQPM  | 184 |
| Hill_D_XP_037904604 | VFFPRN-----RSTPRSPRNSFH---DEGAFFRHPIPTPSRSM-----             | 128 |
| Bdor_D_AHX71830     | VFFPLS-----LSTPRTPTRTSVSYAAGEENTFFRHHNISGGC-----SNASHLQ      | 151 |
| Asus_D_AEF30451     | VFFPPS-----RSTPRTPTRTSVSFAAGEENTFFRQHNISSGGYS-----STQHLQ     | 149 |
| Ccap_D_JAB92755     | VFFPIS-----RSTPRTPTRTSVSFAAGEENTFFRHHNISGGGG--GCSS--SSATHLQ  | 157 |
| MscA_D_APT68153     | IFFPRD-----RSTPLSFSRQQ-----Q-----                            | 93  |
| Lser_D_AKA64736     | VFFPRS-----RSTPRIPTRTSVSFAPGDEVNFFHQSAAPAASSGNAQTQT-----TQ   | 142 |
| Gfus_D_XP_037879387 | VFFPRS-----RSTPRTPTRTSVSFAAGDEVNFFHQSSPAASSSNLQPEPN--NSNSSNQ | 151 |
|                     | :***                                                         |     |

|                     |                                                               |     |
|---------------------|---------------------------------------------------------------|-----|
| Cpip_D_XP_039434833 | ASHTTTPASCSSAA-----PIFHQFPS-----SFSGPTADGGSTTSPAMAG           | 235 |
| Aead_D_XP_029727134 | -----TAACSSAP-----PIIHQFPS-----SYQLPSTSNAST-----              | 242 |
| Bcop_D_XP_037040268 | -----                                                         | 100 |
| Bcop_D_XP_037050104 | -----                                                         | 102 |
| Cnas_D_XP_031624166 | PFS-TP---SSN-----STVIRMHDDYRS-----                            | 118 |
| Dmel_hid            | PPQSAPPMHCSHSYPQSAHMMPHSA----PFGMGTTYAGYTPPPTPNTASAGTSSSS     | 240 |
| Hill_D_XP_037904604 | -----                                                         | 128 |
| Bdor_D_AHX71830     | PPQSAPPMPPSSSHNGAHSQPA-----PQQYQQYTYPTYQYTPPPTPLTANASTCTGN    | 204 |
| Asus_D_AEF30451     | PPQSAPPMPPSSHTSAHSQTT-----PQ-QYQQYSYPHYQYTPPPTPLTANASTCTGN    | 201 |
| Ccap_D_JAB92755     | PPQSAPAMQQSSSHNNAHSQTA-----PQ-QYQQYTYPTYQYTPPPTPLTANASTCTGG   | 209 |
| MscA_D_APT68153     | -----                                                         | 93  |
| Lser_D_AKA64736     | APQSAPPVPNSHH--HNQHQLYGHHPHFA---YQHS GPNYYQYTPPPTPNAATATTSTGT | 197 |
| Gfus_D_XP_037879387 | PPQSAPPTVNNSSHQHYYHSFFPLHPRVAAYHHPNTASGYCQYTPPPTPTTATTST----  | 207 |

|                     |                                                                   |     |
|---------------------|-------------------------------------------------------------------|-----|
| Cpip_D_XP_039434833 | QPTSWP----DDGSESSES DSSSQPSSSSEAAPTGSSPTGCSSSHCLGLGQLHQHRLHHHQ    | 291 |
| Aead_D_XP_029727134 | -ATNWT HVSSGDGDDSESSES DSSSQPSSASDGDSITAPIAGCSPHCLGLLGPPHHHLHQLLD | 301 |
| Bcop_D_XP_037040268 | -----SHQWSTPR                                                     | 108 |
| Bcop_D_XP_037050104 | -----SQCWR SRA                                                    | 110 |
| Cnas_D_XP_031624166 | -----AQWSARRS                                                     | 126 |
| Dmel_hid            | AAFGWHGHP---HSPFTST-----ST-----PLSAPVAPKMRLQRSQS                  | 275 |
| Hill_D_XP_037904604 | -----RNGPPE                                                       | 134 |
| Bdor_D_AHX71830     | I--FGATEATHQRCGVATASTST-----S-----TTSCGMGGHSRLHRSLS               | 244 |
| Asus_D_AEF30451     | V--FGSTEATHQRTC VASTST-----S-----TQSCMAKG HARLHRSFS               | 239 |
| Ccap_D_JAB92755     | NLFNGSTEATHQRTC VASTSTAT---ASTSTAAS-----TSSCGAKG HARLHRSLS        | 258 |
| MscA_D_APT68153     | -----SLRSPR                                                       | 99  |
| Lser_D_AKA64736     | S-----TSGAGGMAHRS LHRSL S                                         | 215 |
| Gfus_D_XP_037879387 | -----GTSTGAVHRLHRSLS                                              | 223 |

|                     |                                                             |     |
|---------------------|-------------------------------------------------------------|-----|
| Cpip_D_XP_039434833 | PLDVGGGG-----GPS-GF--IPPH                                   | 308 |
| Aead_D_XP_029727134 | AAAAAGSGSSTGV-----SSSFNNGSSS-----SSSSNSAGGSSAMVPMS-GC--IPPH | 347 |
| Bcop_D_XP_037040268 | NEMPRRLNSTGEEEDDEDIDSDIGIDECPSATSSSSNSSNSTPASPLPVDFNFEE---H | 165 |
| Bcop_D_XP_037050104 | NGLR-RLHSTGDDTHDDAESSD-----EFSMANGCNVPRQSVVPDYDLEE---H      | 156 |
| Cnas_D_XP_031624166 | VFRRRYRLTSAS-----DEEDYE-----D--EQP-----LSDYEE---H           | 155 |
| Dmel_hid            | DAARRKRLTSTG---EDEREYQ-----SDHEAT-----WDEFGD--RY            | 308 |
| Hill_D_XP_037904604 | AVSRRSRLTSTG---DDDNEGH-----SEHETS-----WDELDE--RY            | 167 |
| Bdor_D_AHX71830     | DAQKRSRRTST---TNDDEREYH-----SEHETS-----WDEFDD--RY           | 278 |
| Asus_D_AEF30451     | DAQKRSRRTST---TNDDERECH-----SEHETS-----WDEFDD--RY           | 273 |
| Ccap_D_JAB92755     | DAQKRSRRSSTN--ANDDERECH-----SEHETS-----WDEFDD--RY           | 293 |
| MscA_D_APT68153     | TSTRRSRLTSTGDYDDDDHECH-----SEHETS-----WDELEHHRL             | 138 |
| Lser_D_AKA64736     | DSARRSRLTSTG---EDEREYQ-----SEHETS-----WDEFED--RY            | 248 |
| Gfus_D_XP_037879387 | DTARRSRLTSTG---EDEREYQ-----SEHETS-----WDEYDD--RY            | 256 |

|                     |                                                             |     |
|---------------------|-------------------------------------------------------------|-----|
| Cpip_D_XP_039434833 | LDFMAGREQLQEFAGKIPQRKKKSK-----                              | 333 |
| Aead_D_XP_029727134 | LDYMAGREQLQEFAGKIPQRKKKSSSSK-----                           | 375 |
| Bcop_D_XP_037040268 | YTYLAARERLQEFPGQVPQKKKKVVSEKAEA-----                        | 197 |
| Bcop_D_XP_037050104 | YTYLAAREHLQPFSGQVPPKKKKRVVEHTEAD-----                       | 188 |
| Cnas_D_XP_031624166 | MQYMAERERLQVFPGRVPPPKKRDTTNTQ-----                          | 184 |
| Dmel_hid            | DNFTAGRERLQEFNGRIPPRKKKSSNSHSSSSNPNVCHTDSQPGGTSQAESGAIHGHSQ | 368 |
| Hill_D_XP_037904604 | EQYMAARERLQEFPGRIPNRKKRKEGKK-----                           | 195 |
| Bdor_D_AHX71830     | DNFTAGRERLQEFNGRIPPRKKKKDVPK-----                           | 306 |
| Asus_D_AEF30451     | DNFTAGRERLQEFNGRIPPRKKKKDVPK-----                           | 301 |
| Ccap_D_JAB92755     | ENFTAGRERLQEFNGRIPPRKKKKDVPK-----                           | 321 |
| MscA_D_APT68153     | ENFTAGRERLQEFKGRIPPRKKKKEAPK-----                           | 166 |
| Lser_D_AKA64736     | DNFTAGRERLQEFNGRIPPRKKKKDVPK-----                           | 276 |
| Gfus_D_XP_037879387 | DNFTAGRERLQEFNGRIPPRKKKKDLPK-----                           | 284 |

: \* \*\*: \* \* \*: \* \*\*:

|                     |                                             |     |
|---------------------|---------------------------------------------|-----|
| Cpip_D_XP_039434833 | -----AGGKSKKAGFLEQTLVWPTLAVTATLIALGCGLLAAR  | 370 |
| Aead_D_XP_029727134 | -----SSSKSKKSKFLEQTLVWPTLAVTATLIALGCGLLAAR  | 412 |
| Bcop_D_XP_037040268 | -----VAVKTQKKPKSKEQRFVWTTV-VTAAVLAVGYISSR-- | 232 |
| Bcop_D_XP_037050104 | -----SPVAAKSKEQNFVWPTV-VTAVVLAVGCGFLVT-     | 220 |
| Cnas_D_XP_031624166 | -----PRKSTDPKMWPAV-AAVVVLAVGCGFLVSR         | 213 |
| Dmel_hid            | QRQVERERQKAKAEKKKPSFTWPTV-VTVFVLAMGCGFFAAR  | 410 |
| Hill_D_XP_037904604 | -----TK-----EQSFTWPTV-VTVFVFAVGCGLVAR       | 222 |
| Bdor_D_AHX71830     | -----SKYEKKVRERPFKGFIWPTV-VTVIVVAIGCGFLVTR  | 342 |
| Asus_D_AEF30451     | -----SKSEK----KQFKAFIWPTV-VTVIVVAMGCGFLVAR  | 333 |
| Ccap_D_JAB92755     | -----SRAER---KQFKAFIWPTV-VTVIVVAMGCGFLVAR   | 353 |
| MscA_D_APT68153     | -----TKPKAK----DPCFTWPTV-VTVFVFAMGCGYLVAR   | 197 |
| Lser_D_AKA64736     | -----TKPEKK----EQSFTWPAV-VTVFVFAMGCGFLVAR   | 307 |
| Gfus_D_XP_037879387 | -----PKSEKK----EQSFTWPAV-VTVFVAMGCGFLVAR    | 315 |

\* :: ... ..\*:\*
