# Supplementary material for: Deep Conservation of Hid-Like RHG Gene Family Homologs in Winged Insects Revealed by “Taxon Hopping” BLAST
Source: MDPI journal article supplement (doi:10.3390/insects12110957), 2021-10-21
Supplement: s1 [file s1]

|                       |                                                              |    |
|-----------------------|--------------------------------------------------------------|----|
| Cced_HEA_VVC35986     | MAVPFDFDEIHPE--GNHFTVIQNLLREMLTLLRWLPWTASGNPLPNSTLDNPFVPPYLI | 58 |
| Sfla_HEA_XP_025413012 | MAVPFRVEG---DSEDHSHYLRIENLLKELLTLLRWMPWTVTGMPTATA--VIDNS---- | 51 |
| Apis_HEA_XP_001950202 | MAVPFRM-EPDPEVMRRHYLRIQDLIIQLMVQLRQLPSVMIGNSARPSVINYHDL----- | 55 |
| Agos_XP_027846023     | MAVPFRPPSHNSDTARDHYLRIENLLRELLTLLSRMPSWMSGDLSSYSNNGINISP---- | 56 |
| Acra_HEA_KAF0773171   | MAIPFRPPSHNSDTARDHYLRIENLLRELLTLLSRMPSWMNGDLSSYSNNGINVSP---- | 56 |
| Agly_HEA_KAE9536444   | MAVPFRPPSHNSDTARDHYLRIENLLRELLTLLSRMPSWMNGDLSSYSNNGINISP---- | 56 |
| Mper_HEA_XP_022175586 | MAIPFVMPEPDPDTPMAHYLRIQNLLRELLTLLSRMPSRMIGDPTNYPYTNISIFS---- | 56 |
| Dnox_HEA_XP_015379466 | MAIPFVMPEPDPDTPMAHYLRIQNLLRELLTLLRRMPSRIIGDPSNYPYTNISLFS---- | 56 |
| Rmai_HEA_XP_026810777 | MAIPFNPPSSNPDATRDHYLRIQNLLKELLTLLRRMPSWMIGDQ---YANINMAS----  | 52 |
| Msac_HEA_XP_025190335 | MAIPFDPPSPNPDTARDHYLQIQNLLKELLTLLRRMPSWMIGDQHNYPYTNINIST---- | 56 |
|                       | **.* : : *:* : : . * : *                                     |    |

|                       |                                                              |     |
|-----------------------|--------------------------------------------------------------|-----|
| Cced_HEA_VVC35986     | QDFPVIQRLMEGVERVRQQVEREDLREQHQIHLERLRLRQRAH--QIRQQERQQEREQ   | 116 |
| Sfla_HEA_XP_025413012 | QA----TF-ML---QRRQTAGNRQQSARGLVHHHRLATAT-----AET-HNR         | 90  |
| Apis_HEA_XP_001950202 | ---PQPDPLEE---RRRPWIQQRSSE----HRRRMREEQ-----                 | 85  |
| Agos_XP_027846023     | QTVPPAQSLLE---RDRLWVQQQHSIR--MFHRRRLRERQQERREQQQVVEEQ-ESQ    | 110 |
| Acra_HEA_KAF0773171   | QTVPPAQSLLE---RDRLWVQQQHSIR--MFHRRRLRERQQERREQQQVVEEQ-ESQ    | 110 |
| Agly_HEA_KAE9536444   | QTVPPAQSLLE---RDRLWVQQQHSIR--MFHRRRLRERQQERREQQQVVEEQ-ESQ    | 110 |
| Mper_HEA_XP_022175586 | SGPPPYSE-EV---RDRLWAQQQASAR--AFNRRCVRERLQQR-----Q----        | 95  |
| Dnox_HEA_XP_015379466 | SDPPPYSE-EV---RDRLWVQQQSSAR--AFHRRRLRE---R-----Q----         | 91  |
| Rmai_HEA_XP_026810777 | QTPLTYLQEEE---NNRLWVQQQQRSMR--AFHRRRLRERQHQERRAQQQELERQQ---- | 103 |
| Msac_HEA_XP_025190335 | QTPSPYSA-EE---SNRLWVQQQHSMR--LFHRRRLRERQQE-RREQQQELERQQ----  | 105 |
|                       | * .. : . :                                                   |     |

|                       |                                                             |     |
|-----------------------|-------------------------------------------------------------|-----|
| Cced_HEA_VVC35986     | RRQQQQPGFLPDLVASSVAIPGPAPRLEPDLIRPERQPAPEPQPEPEPAP-----     | 167 |
| Sfla_HEA_XP_025413012 | SEGQQQLPLPDLITSTMSSAPPPPP-----                              | 117 |
| Apis_HEA_XP_001950202 | QRSEEQPPLLPDLVASCQSAGPSHSAGPSHSGVPSHSAGPSHLAGPSHSAGPSHSAGPS | 145 |
| Agos_XP_027846023     | QHAEQQQVLLPDLVTSCGPTVRQQPPP-----                            | 137 |
| Acra_HEA_KAF0773171   | QHGEQQQVLLPDLVSSCGPTVRQQPPP-----                            | 137 |
| Agly_HEA_KAE9536444   | QHVEQQQVLLPDLVTSCGPTVRQQPPP-----                            | 137 |
| Mper_HEA_XP_022175586 | QQRQQQSLLPDLVTSCQQSANPPPPP-----                             | 122 |
| Dnox_HEA_XP_015379466 | QREQQQPPLPDLVTSCGQAANPPPPP-----                             | 118 |
| Rmai_HEA_XP_026810777 | QSE-QQRPLLPDLVSSCGPSRQLPPP-----                             | 129 |
| Msac_HEA_XP_025190335 | QSDQQQLLLPDLVSSCGPTSRQPPPP-----                             | 132 |
|                       | :* ***::*                                                   |     |

|                       |                                                            |     |
|-----------------------|------------------------------------------------------------|-----|
| Cced_HEA_VVC35986     | -----APAPADPVPRSPQPR--                                     | 184 |
| Sfla_HEA_XP_025413012 | -----PPPPQP--                                              | 124 |
| Apis_HEA_XP_001950202 | HSAGPSHLAGPSHSAGPSQSAGPLQSAGPSQSASPPQSDSSLQSDSPQSDNPPQQQLQ | 205 |
| Agos_XP_027846023     | -----PPPPSSQ---QRP                                         | 148 |
| Acra_HEA_KAF0773171   | -----PPPPSSQ---QRS                                         | 148 |
| Agly_HEA_KAE9536444   | -----PPPPSSQ---QRP                                         | 148 |
| Mper_HEA_XP_022175586 | -----PPPPPPSPQQQLQ                                         | 136 |
| Dnox_HEA_XP_015379466 | -----PPPPPPSPQQQLQ                                         | 132 |
| Rmai_HEA_XP_026810777 | -----PPPPPSAPLQQQQQ                                        | 143 |
| Msac_HEA_XP_025190335 | -----PPPPQ-----Q                                           | 138 |

|                       |                                                             |     |
|-----------------------|-------------------------------------------------------------|-----|
| Cced_HEA_VVC35986     | -----GA---YRRKKHVKVESVRIQMCPSCSLNGGTFTAINTLSTDQQR--E-----   | 227 |
| Sfla_HEA_XP_025413012 | -----SADKKPTKKILLELCEPCYYDHQ-KFKVVAANRRDKSNDGLPLSRRHR       | 173 |
| Apis_HEA_XP_001950202 | AQQQTAV---EGEDKIAGAVKLQVAVCPTCYYGKERKLVIAIAKLDENG--NPI----- | 255 |
| Agos_XP_027846023     | EQQHQSABD---DDKFVDAVKLQVAVCPTCYYGKERKLVIGVAKLDGNG--KPI----- | 198 |
| Acra_HEA_KAF0773171   | E-QHQSABD---DDKFVDAVKLQVAVCPTCYYGKERKLVIGVAKLDGNG--KPI----- | 197 |
| Agly_HEA_KAE9536444   | E-QHQSABD---DDKFVDAVKLQVAVCPTCYYGKERKLVIGVAKLDGNG--KPI----- | 197 |
| Mper_HEA_XP_022175586 | AQQ-QSAEEEDIEDKIARAVKLQVAVCPTCYYSEERKLVIAIAKLDENG--NPI----- | 188 |
| Dnox_HEA_XP_015379466 | AQQ-LSABD---EDKIGRAVMLQVAVCPTCYYSKEGKLVIAIAKLDENG--KPI----- | 181 |
| Rmai_HEA_XP_026810777 | PEQQQSTVD---DDKFVDAVKLQVAVCPTCYYGKERKLVIAIAKLDENG--KPI----- | 193 |
| Msac_HEA_XP_025190335 | SVQRQSABD---DDKFLGAVKLQVALCPTCYYGKERKLVIAIAKLDENG--KPI----- | 188 |

. \*        : . : \* \*        .        :        \* .

|                       |                                                           |     |
|-----------------------|-----------------------------------------------------------|-----|
| Cced_HEA_VVC35986     | -----PTFDDDEED-----GYCWEIKRRLKSLFQPSNIDSSILTAAMVIIGWKMF   | 275 |
| Sfla_HEA_XP_025413012 | STGIADRRSFDNDAEESVTVVKS--NVKQRLMSLLTPSKIDSSILTAVFVIIGWKMF | 231 |
| Apis_HEA_XP_001950202 | -----RWTN-RDDEEPVVFENKSSK-VKRRIMSLQPSHIESSVLTAMFVIIGWKMF  | 307 |
| Agos_XP_027846023     | -----RWSTHREVSTYIYFYTTCSFSAQPRVSSNLYQLRXTKRYLLSFYFI-----  | 244 |
| Acra_HEA_KAF0773171   | -----RWNTHRDDEELLVIEDKSTK-VKRRIMSLQPSKIESSVLTAMFVIIGWKMF  | 250 |
| Agly_HEA_KAE9536444   | -----RWSTHREDEELLVIEDKSTK-VKRRIMSLQPSKIESSVLTAMFVIIGWKMF  | 250 |
| Mper_HEA_XP_022175586 | -----RWTNNRDDEEPMVVENKISK-VKRRIMSLQPSKIESSVLTAMFVIIGWKMF  | 241 |
| Dnox_HEA_XP_015379466 | -----RWTNHRDDEEPVVENKSSK-VKRRIMSLQPSKIESSVLTAMFVIIGWKMF   | 234 |
| Rmai_HEA_XP_026810777 | -----RWNANRDDEELLVFENKSTK-VKRRIMSLQPSKIESSVLTAMFVIIGWKMF  | 246 |
| Msac_HEA_XP_025190335 | -----RWTNTRDDEELLIVENQSTK-VKRRIMSLHPSKIESSVLTAMFVIIGWKMF  | 241 |

.        : .        : \* : \* :        .        \* :        . \*

|                       |   |     |
|-----------------------|---|-----|
| Cced_HEA_VVC35986     | Q | 276 |
| Sfla_HEA_XP_025413012 | Q | 232 |
| Apis_HEA_XP_001950202 | Q | 308 |
| Agos_XP_027846023     | - | 244 |
| Acra_HEA_KAF0773171   | Q | 251 |
| Agly_HEA_KAE9536444   | Q | 251 |
| Mper_HEA_XP_022175586 | Q | 242 |
| Dnox_HEA_XP_015379466 | Q | 235 |
| Rmai_HEA_XP_026810777 | Q | 247 |
| Msac_HEA_XP_025190335 | Q | 242 |
