# Supplementary material for: Deep Conservation of Hid-Like RHG Gene Family Homologs in Winged Insects Revealed by “Taxon Hopping” BLAST
Source: MDPI journal article supplement (doi:10.3390/insects12110957), 2021-10-21
Supplement: s1 [file s1]

|                      |                                                                                        |    |
|----------------------|----------------------------------------------------------------------------------------|----|
| Nlec_HY_XP_015511746 | MAIPFALPSEDEAE-AQE-RRQLGQLLDVYGILQQVIRARSYNPG-QNHRVNRSSGEVP                            | 57 |
| Nvit_HY_XP_003424554 | MAIPFALPSEDEAE-DQSQQQLEQLMLDLYAALQQVLRARNSQHPS-RNHRLPRRSADMS                           | 58 |
| Btre_HY_XP_033214430 | MAIPFALPSEDEAE-AQG-QQLEQLMLDLYAALQQVLRNRSLQHPS-RNHRLPRRSGDTS                           | 57 |
| Mdem_HY_XP_008555096 | MAIPFNLPSDEAE-AQS-QQLEQLMLDLYAALQQVLRSRSAQHPS-RNHRLPRRVGDTG                            | 57 |
| Ccin_HY_XP_015609297 | MARPF <sup>1</sup> LPSEDEAE-EQG-QQLEQLMLDLYAALQQVLRSRRAEHPS-RNHRLPRRAGDVP              | 57 |
| Oabi_HY_XP_012277082 | MAIPFALPSEDEAE-AQG-QQLEQLMLDLYAALQQVLRIRNAQHPS-RNHRLPRRSGDMP                           | 57 |
| Ccal_HY_XP_017884183 | MAIPFALPTEDDAE-AQG-QQLEQLMLDLYAALQQVLRTRTSQHPSRNHRI <sup>1</sup> PRA----               | 54 |
| Bimp_HY_XP_024222863 | MAIPF <sup>1</sup> LP <sup>1</sup> SDDEAE-VQG-QDLEQLMLALYAALQQVLRNRNDQHPS-RNHRLPRM---- | 53 |
| Bter_HY_XP_012175674 | MAIPF <sup>1</sup> LP <sup>1</sup> SDDEAE-VQG-QELEQLMLALYAALQQVLRNRNDQHPS-RNHRLPRM---- | 53 |
| Dnov_HY_XP_015429159 | MAIPFSLPSDDDAE-AQG-QQLEQLMLDLYAALQQVLRRTAQHPS-RNHRLPRRAGD--                            | 55 |
| Nmel_HY_XP_031834337 | MAIPFSLPSDDDAE-AQG-QQLEQLMLDLYAALQQVLRRTAQHPS-RNHRLPRRAGDGF                            | 57 |
| Mgen_HY_XP_033321541 | MAIPFSLPSDDDAE-AQG-QQLEQLMLDLYAALQQVLRRTAQHPS-RNHRLPRRAGDGF                            | 57 |
| Ador_HY_XP_006609937 | MAIPFALPSDDEAE-TQT-QQLEQLMLDLYAALQQVLRRTAQHPSRNHRLPRRS----                             | 54 |
| Aflo_HY_XP_012338864 | MAIPFALPSDDEAE-TQT-QQLEQLMLDLYAALQQVLRRTAQHPSRNHRLPRRS----                             | 54 |
| Amel_HY_XP_006565903 | MAIPFALPSDDEAE-TQT-QQLEQLMLDLYAALQQVLRRTAQHPSRNHRLPRRS----                             | 54 |
| Olig_HY_XP_034171762 | MAIPFALPSDDEAE-AQG-QQLEQLMLDLYAALQQVLRRTVQHPS-RNHRI <sup>1</sup> PRAADGF               | 57 |
| Obic_HY_XP_029055907 | MAIPFALPSDDEAE-AQG-QQLEQLMLDLYAALQQVLRRTVQHPS-RNHRI <sup>1</sup> PRAADGF               | 57 |
| Emex_HY_XP_017765203 | MAIPFVLPSNDEAE-AQG-QQLEQLMLDLYAALQQVLR <sup>1</sup> SRNTQHPS-RNHRLPRRV----             | 53 |
| Pgra_HY_XP_020280259 | MAIPFT <sup>1</sup> SERS-----PEEQVLLD <sup>1</sup> TYLCIENALRSRSARHP-SRNHRAPRQHVGI-    | 48 |
| Obir_HY_XP_011342863 | MAIPFVQNDNNNERSQLEEQQLKMF <sup>1</sup> LDYVSLHNVLRSRHAQHTASRNHRVPRQ <sup>1</sup> PAGTN | 60 |

|                      |                                                              |     |
|----------------------|--------------------------------------------------------------|-----|
| Nlec_HY_XP_015511746 | FPELNP-----SAPVPSRPRPRRRRLVSENSALKKEQPST-----SY              | 147 |
| Nvit_HY_XP_003424554 | FPECSGASAAAMMPVPSRPKPRRRRLTSEGLPEKAQLPQRLDSCGTGGRTCCAHHL--   | 168 |
| Btre_HY_XP_033214430 | FPECS-----APVPSRPRKPRRRRLTSESSIPEKGPSES---NK-CNGTCCPGHLNL    | 157 |
| Mdem_HY_XP_008555096 | FPECSA-----APVPSRPRPRRRRLTSESSVLEKGATSR---SDNINSVCC-RHL--    | 156 |
| Ccin_HY_XP_015609297 | FPECSA-----APVPSRPRPRRRRLTSEGSVLEKER-----VNASC-GQI--         | 149 |
| Oabi_HY_XP_012277082 | FPEAS-----VPVPIPRPRRRRLTSECSVQEKER-----MNACC-GQP--           | 148 |
| Ccal_HY_XP_017884183 | FPECSGES--SLAPVPSRPRPRRRRLASESSGAATAKKTTP--PAAKQICNNCF-GDL-- | 159 |
| Bimp_HY_XP_024222863 | FPESNDVN-DVAPVPNPRPRPRRRRLASEGGSSAAVKKT---SAVKSICKCCC-GHI--  | 158 |
| Bter_HY_XP_012175674 | FPESNNDAI-DVAPVPNPRPRPRRRRLASEGGSSAAVKKT---SAVKSICKCCC-GHI-- | 158 |
| Dnov_HY_XP_015429159 | FPECSTDE---APEPSRPRPRRRRLASEG-G--AVKKG---PIGEPTCNSSC-GHF--   | 153 |
| Nmel_HY_XP_031834337 | FPECSSDE---APVPSRPRPRRRRLASEG-G--AVKKG---PVGESACNNCC-GHF--   | 159 |
| Mgen_HY_XP_033321541 | FPECSNDE---APVPSRPRPRRRRLVSESGG--AVKKG---PVGELTCNSCC-GHF--   | 160 |
| Ador_HY_XP_006609937 | FPECSGDEN-GAAPVPSRPRPRRRRLASEGGG-ATMKKG---PATRICKKCC-GHL--   | 158 |
| Aflo_HY_XP_012338864 | FPECSGDEN-GAAPVPSRPRPRRRRLASEGGG-ATTKKG---PATERICKKCC-GHL--  | 158 |
| Amel_HY_XP_006565903 | FPECSGDEN-GAAPVPSRPRPRRRRLASEGGG-ATMKKG---PATERICKKCC-GHL--  | 158 |
| Olig_HY_XP_034171762 | FPECSGDEN-VLAPTNPFRPRRRRLASECGGAAAMKKG---P-AEPTCNNCC-GHF--   | 161 |
| Obic_HY_XP_029055907 | FPECSGDEN-VLAPTNPFRPRRRRLASECGGAAAMKKG---P-AEPTCNNCC-GHF--   | 161 |
| Emex_HY_XP_017765203 | FPECSGDES-GLAPVPSRPRPRRRRLTSEGGSSAAAMKKG---PVAEPICNSCC-GHY-- | 158 |
| Pgra_HY_XP_020280259 | FPECSVNGN--IVPLPSRPLPRR-RLASEGSSLRTLRS-ETRQNEGNTSNTCCC-YP--  | 155 |
| Obir_HY_XP_011342863 | FPECTN-SS--SGPLPSRPRPRR-RFAESSIMESSVMGSPGPIEVSICNGSCC-HL--   | 170 |
|                      | *** . * * * * * * . : . **                                   |     |

|                      |                                                             |     |
|----------------------|-------------------------------------------------------------|-----|
| Nlec_HY_XP_015511746 | YQAPSDENEWANVGANLRNIADDFHASKNTDSGAEKSSLPVIGND-----          | 192 |
| Nvit_HY_XP_003424554 | -AASLDEREWATVGANLRNIADDFHASKTKDAEVEKSRLPFIGSSFSSTSGLGSSGLGS | 227 |
| Btre_HY_XP_033214430 | SATTLNEREWAVGTNLRNIADDFHASKTKDAEVEKSRLPLLGSTFSSTSS-----     | 208 |
| Mdem_HY_XP_008555096 | -GHSCNETEWASVGANLRNIADDFHASKTKDAEIEKSRLPFFGAGFPSVTTS-----   | 207 |
| Ccin_HY_XP_015609297 | -GTVVNEREWTSVGTNLRNIADDFHAAKTKDAEVEKSRLPFIGSGFSS-----       | 196 |
| Oabi_HY_XP_012277082 | -PTA-IEREWASIGSNLRNIADDFHASHTKGAEVEKSRLPFIGSTS-----         | 192 |
| Ccal_HY_XP_017884183 | HTQAYNQWQWTNMGANLRNIADDFHASKTKAAEIEKSRLAAMNPGYASSGN-----    | 210 |
| Bimp_HY_XP_024222863 | -GQAFNGNYWATVGANLRNIADDFHASKTKAAEIEKSRLSAMNPSFANTNN-----    | 208 |
| Bter_HY_XP_012175674 | -GQAFKGSYWATVGANLRNIADDFHASKTKAAEIEKSRLSAMNPSFANTNN-----    | 208 |
| Dnov_HY_XP_015429159 | -GQAFNESQWASVGANLRNIADDFHASQTKAAEIEKSRLPALSPGFASAQN-----    | 203 |
| Nmel_HY_XP_031834337 | -GQAFNESQWASVGANLRNIADDFHASKTKAAEIEKSRLPALSPGFAGANN-----    | 209 |
| Mgen_HY_XP_033321541 | -GQAFNESQWASVGANLRNIADDFHASKTKAAEIEKSRLPTLSPGFVGSNP-----AA  | 212 |
| Ador_HY_XP_006609937 | -GQAFNESQWASVGANLRNIADDFHASQTKAAEIEKSRLPAMNPSFADSNN-----    | 208 |
| Aflo_HY_XP_012338864 | -GQAFNESQWASVGANLRNIADDFHASQTKAAEIEKSRLPAMNPSFADSNN-----    | 208 |
| Amel_HY_XP_006565903 | -GQAFNESQWASVGANLRNIADDFHASQTKAAEIEKSRLPAMDPSFADSNN-----    | 208 |
| Olig_HY_XP_034171762 | -GQAFNESQWANVGANLRNIADDFHASKTKAAEIEKSRLPAMNPGFANSNGN-----   | 211 |
| Obic_HY_XP_029055907 | -GQAFNESQWANVGANLRNIADDFHASKTKAAEIEKSRLPAMNPGFANSNGN-----   | 211 |
| Emex_HY_XP_017765203 | -GQAFNESQWASVGANLRNIADDFHASKTKAAEIEKSRLPAMNSGFANSNN-----    | 208 |
| Pgra_HY_XP_020280259 | -S-QNERQSWTNMGTNLRNIAGDFHACKTKDAESEKSRLSVNGRRLTNG-----      | 202 |
| Obir_HY_XP_011342863 | -G-QNERQSWANVGNTNLRSIAGDFHACRTKDAEGEKSRLPVIGPLPNARN-----    | 219 |
|                      | * . : * : *** . ** . ***** . : . . * * * * *                |     |

|                      |                                         |     |
|----------------------|-----------------------------------------|-----|
| Nlec_HY_XP_015511746 | --ESSPDSFLLIPAPLRETLWTTVALYLGWRLVSHLR   | 229 |
| Nvit_HY_XP_003424554 | SPSGSTDSILSLLMPAPLRETLWTTVALYLGWRLVSRLR | 266 |
| Btre_HY_XP_033214430 | --NSSTDSILSLLIPAPLRETLWTTVALYLGWRLVSRLR | 245 |
| Mdem_HY_XP_008555096 | --IPSSDGFLSMLIPAPLRETLWTTVALYLGWRLVSRLR | 244 |
| Ccin_HY_XP_015609297 | --SPSTDSLLSLLIPAPLRETLWTTVALYLGWRLVSRLR | 233 |
| Oabi_HY_XP_012277082 | ---SAADSFLLIPAPLRETLWTTVALYLGWRLVSRLR   | 228 |
| Ccal_HY_XP_017884183 | ---SSTDSYMSLLIPAPLRETLWTTVALYLGWRLVSHLR | 246 |
| Bimp_HY_XP_024222863 | -SSESTDSFLLIPAPLRETLWTTVALYLGWRLVSRLR   | 246 |
| Bter_HY_XP_012175674 | -TSGSTDSFLLIPAPLRETLWTTVALYLGWRLVSRLR   | 246 |
| Dnov_HY_XP_015429159 | -TNGSTDSLLSLLIPAPLRETLWTTVALYLGWRLVSRLR | 241 |
| Nmel_HY_XP_031834337 | -TNGSTDSILSLLIPAPLRETLWTTVALYLGWRLVSRLR | 247 |
| Mgen_HY_XP_033321541 | SNAGSTDSLLSLLIPAPLRETLWTTVALYLGWRLVSRLR | 251 |
| Ador_HY_XP_006609937 | -TSGSTDSILSLLIPAPLRETLWTTVALYLGWRLVSRLR | 246 |
| Aflo_HY_XP_012338864 | -TSGSTDSILSLLIPAPLRETLWTTVALYLGWRLVSRLR | 246 |
| Amel_HY_XP_006565903 | -TSGSTDSILSLLIPAPLRETLWTTVALYLGWRLVSRLR | 246 |
| Olig_HY_XP_034171762 | -ATGSTDSLLSLLIPAPLRETLWTTVALYLGWRLVSRLR | 249 |
| Obic_HY_XP_029055907 | -AAGSTDSLLSLLIPAPLRETLWTTVALYLGWRLVSRLR | 249 |
| Emex_HY_XP_017765203 | -ANGSTDSILSLLIPAPLRETLWTTVALYLGWRLVSRLR | 246 |
| Pgra_HY_XP_020280259 | -NSNSTDMLSLLIPTPLRETLWATVALYVGWKLVSRLR  | 240 |
| Obir_HY_XP_011342863 | RNSSFTDNLSLLIPTPLRETLWATMALYLGWRLVSRLR  | 258 |
|                      | . :*:*: :*****.*:***:**:***:**          |     |
