# Supplementary material for: Deep Conservation of Hid-Like RHG Gene Family Homologs in Winged Insects Revealed by “Taxon Hopping” BLAST
Source: MDPI journal article supplement (doi:10.3390/insects12110957), 2021-10-21
Supplement: s1 [file s1]

|                      |                                                         |
|----------------------|---------------------------------------------------------|
| Aaeg_mx_ABD47742     | MAIAFYIP-----AIDDEIEK-----Q-----                        |
| Aalb_mx_AAW72439     | MAIAFYIP-----AIDDEIEK-----R-----                        |
| Cpip_mx_XP_039452301 | MAIAFYIP-----AIDDEVER-----Q-----                        |
| Agam_mx_ABD47743     | MAIAFYIP-----SLDDEAEN-----L-----                        |
| Aste_mx_XP_035892327 | MAIAFYIP-----SLDDAEEN-----Q-----                        |
| Aaeg_GFNA01179070    | MAVAFYIP-----SVDEEPPV-----K-----                        |
| Aalb_GCLM01039770    | MAVAFYIP-----SVDEDEPV-----K-----                        |
| Cpip_XP_039438427    | MAVAFNVP-----SVHEDDEG-----Q-----                        |
| Aaeg_XP_021695521    | MAIAFY-----CED-EDPKVMF-GGSYGYHQSYQ-----                 |
| Aalb_XP_029730094    | MAIAFY-----CED-EDPKMMF-SGGYHHHHSYQWQQQPQQ               |
| Cpip_XP_039452297    | MAIAFY-----CEEEEDPKGYDYSYGYGYQLQSQQ-----                |
| Asus_D_AEF30451      | MAVVFYMP-----AGADD-----                                 |
| Bdor_D_AHX71830      | MAVVFYMP-----GGGDD-----                                 |
| Lser_D_AKA64736      | MAVPFYLP-----GGADD-----                                 |
| Bodo_D_KAG4071353    | MAVPFFVPD-----G--DD-----                                |
| Aste_XP_035899618    | MAKPFMLPE-----SGPGG-----                                |
| Agam_GIBN01014598    | MAKPFSLPE-----PGPGG-----                                |
| Aalb_D_XP_029727134  | MAIPFLQPEEDESARHHGANGPNTASAHAGVGA-----                  |
| Aaeg_XP_021705280    | MAIPFLQPEEDESARH--GNGQ--LVHAGAGA-----                   |
| Cpip_XP_039434833    | MAIPFLQPEDDDAAR-----LQHA-----                           |
|                      |                                                         |
| Aaeg_mx_ABD47742     | YQ--LQMMQQQQ-----QILMQ-----Q--Q-QN-----QNQI             |
| Aalb_mx_AAW72439     | YQ--LQ---QQ-----LILAQR-----Q--Q-QN-----QQQF             |
| Cpip_mx_XP_039452301 | HQ--LQ---LQ-----Q---Q-----Y--Q-QY-----QHQ-              |
| Agam_mx_ABD47743     | RL--LQ---QQ-----QMVLLQ-RQYLLQ--Q-QYHLQAQLNLVHQQQLALEQQ- |
| Aste_mx_XP_035892327 | RL--LE---QQ-----QIVLLQ-RQYLLQ--Q-QYHLQAQMNQLRQQQLALEQQ- |
| Aaeg_GFNA01179070    | PN--HP---QQ-----VG-----Q--Q-QH-----QQQ-                 |
| Aalb_GCLM01039770    | PNSPHP---QQ-----VG-----G--G-QH-----QQA-                 |
| Cpip_XP_039438427    | WK--PA---NQ-----LG-----QPNQ-QP-----QHQ-                 |
| Aaeg_XP_021695521    | SQ--HS---VA-----VG-----Q--QHAG-----TGE-                 |
| Aalb_XP_029730094    | TQ--HA---VA-----VG-----Q--QHAG-----SGS-                 |
| Cpip_XP_039452297    | SQ--HA---ATAPPATGSQQP---VA-----Q--Q-AA-----SGD-         |
| Asus_D_AEF30451      | -----                                                   |
| Bdor_D_AHX71830      | -----                                                   |
| Lser_D_AKA64736      | -----                                                   |
| Bodo_D_KAG4071353    | -----                                                   |
| Aste_XP_035899618    | -----                                                   |
| Agam_GIBN01014598    | -----                                                   |
| Aalb_D_XP_029727134  | -----                                                   |
| Aaeg_XP_021705280    | -----                                                   |
| Cpip_XP_039434833    | -----                                                   |
| Aaeg_mx_ABD47742     | SSPP-----                                               |
| Aalb_mx_AAW72439     | SSPP-----                                               |

|                      |                                                             |
|----------------------|-------------------------------------------------------------|
| Cpip_mx_XP_039452301 | -SPP-----                                                   |
| Agam_mx_ABD47743     | -SAA-ISTN-----TAAP-----G--TA--GP-----                       |
| Aste_mx_XP_035892327 | -SAA-ISTT-----AGTS-----GASST--GS-----                       |
| Aaeg_GFNA01179070    | -S-----                                                     |
| Aalb_GCLM01039770    | -S-----                                                     |
| Cpip_XP_039438427    | -H-----                                                     |
| Aaeg_XP_021695521    | -G-----                                                     |
| Aalb_XP_029730094    | -G-----                                                     |
| Cpip_XP_039452297    | -D-----                                                     |
| Asus_D_AEF30451      | -SASSSSGS-----HGSG-----GSGSA--AS----S-----                  |
| Bdor_D_AHX71830      | -SASSSSGG-----HGSA-----GSGSA--AS----S-----                  |
| Lser_D_AKA64736      | -TVS-SGGT-----TSSD-----GASSA--AS----S-----                  |
| Bodo_D_KAG4071353    | -QRS-NG-----S-----                                          |
| Aste_XP_035899618    | -GSS-SSGA-GPP-SNAPSNTNTVAGNTAPSTPA-PIGTGSA--ASN--GPSGASGHVS |
| Agam_GIBN01014598    | -GSS-SSGA-GPPANNVSSNSNAAAGGTAPSTPALQNGSGSG--ASHPANPAGPLGHPP |
| Aalb_D_XP_029727134  | -GAG-SSGTG-----SASASGSGA-VVVGAG--SS----GGAVM---             |
| Aaeg_XP_021705280    | -GAG-SSAA-----SGSAGSSSG-VVGAGSGIAASG----GGAVM---            |
| Cpip_XP_039434833    | -----A-----TQSGPPTLG-PVSPGPG--SS----GGPLLHPP                |
| Aaeg_mx_ABD47742     | -----                                                       |
| Aalb_mx_AAW72439     | -----                                                       |
| Cpip_mx_XP_039452301 | -----                                                       |
| Agam_mx_ABD47743     | -----                                                       |
| Aste_mx_XP_035892327 | -----                                                       |
| Aaeg_GFNA01179070    | -----                                                       |
| Aalb_GCLM01039770    | -----                                                       |
| Cpip_XP_039438427    | -----                                                       |
| Aaeg_XP_021695521    | -----                                                       |
| Aalb_XP_029730094    | -----                                                       |
| Cpip_XP_039452297    | -----                                                       |
| Asus_D_AEF30451      | -----                                                       |
| Bdor_D_AHX71830      | -----                                                       |
| Lser_D_AKA64736      | -----                                                       |
| Bodo_D_KAG4071353    | -----                                                       |
| Aste_XP_035899618    | SAPI----SVTGANSSQQYHLQQLHHHHQQLQQHYQSSYQGSHPALMTAPGPGSVP--V |
| Agam_GIBN01014598    | SAPI----PMPVPTSPQQYHLQQLHHHHQQLQQHYQ-AYQGPHTLMAAPPSSVA--V   |
| Aalb_D_XP_029727134  | ---LAGATGPMFVPNSP-----AAPII                                 |
| Aaeg_XP_021705280    | ---MVGATGPLPIPNSP-----AP--I                                 |
| Cpip_XP_039434833    | PSPLV--SGSIPIPGSP-----AP--I                                 |
| Aaeg_mx_ABD47742     | -----P-----                                                 |
| Aalb_mx_AAW72439     | -----P-----                                                 |
| Cpip_mx_XP_039452301 | -----P-----                                                 |
| Agam_mx_ABD47743     | -----NAATVTAA-----                                          |

|                      |                                                            |
|----------------------|------------------------------------------------------------|
| Aste_mx_XP_035892327 | -----TASGVAVP-----                                         |
| Aaeg_GFNA01179070    | -----                                                      |
| Aalb_GCLM01039770    | -----                                                      |
| Cpip_XP_039438427    | -----                                                      |
| Aaeg_XP_021695521    | -----                                                      |
| Aalb_XP_029730094    | -----                                                      |
| Cpip_XP_039452297    | -----                                                      |
| Asus_D_AEF30451      | --TS-----QSPNTTTSATQTPMQSP--LMASP-HIVMALCEAVYQ---SLN-----  |
| Bdor_D_AHX71830      | --TS-----QSPNTTTSATQTPMQSP--L--PP-HFMAF----YQ---YMN-----   |
| Lser_D_AKA64736      | --LQ-----SSPNTTSSATQTPMQSP--L--LPGEVIMAI----YELIRYNS-----  |
| Bodo_D_KAG4071353    | --TP-----QSQSTISSATQTPQSP--V--NDEHLVQAF----YE---ALSLYSAN   |
| Aste_XP_035899618    | -VDPHLLPMTPPASGFATAIQTPQMAP--V--N-EQLVQAL----YE---AIYRCSWG |
| Agam_GIBN01014598    | PVDPHLLPMTPPSPGFATTVQTPQIPP--V--N-EQLVQAL----YE---AIYRCSLG |
| Aalb_D_XP_029727134  | -----SSGTSTAVQTPLIGP--M--NSDQLVQLF----YE---ALYRYSRG        |
| Aaeg_XP_021705280    | -----SSGTSTAVQTPLIGP--M--NSDQLVQLF----YE---ALYRYSRG        |
| Cpip_XP_039434833    | GVPP-----PPPSGTSTAVQTPLLGPAGLM--HGDQLVQLF----YE---ALYRYSRG |
|                      |                                                            |
| Aaeg_mx_ABD47742     | -S-PTSPTESIPP----TPPLTPT--MT-----                          |
| Aalb_mx_AAW72439     | -S-PT---ESIPP----TPPLTPT--MT-----                          |
| Cpip_mx_XP_039452301 | -T-PTTPTESIPP----TPPHTPT--MT-----                          |
| Agam_mx_ABD47743     | -T-PQPPAASMPPSTT--TNTQIPS--MV-----SA-----                  |
| Aste_mx_XP_035892327 | -TVPTLTTPSAPPTST--TPQQPPS--TS---IPPNA-----                 |
| Aaeg_GFNA01179070    | -----PN---QT-----TS-----                                   |
| Aalb_GCLM01039770    | -----N---QT-----TG-----                                    |
| Cpip_XP_039438427    | -----PH---HHHHVG--AS-----                                  |
| Aaeg_XP_021695521    | -----TT--DE-----NN-----                                    |
| Aalb_XP_029730094    | -----GT-VVDE-----NN-----                                   |
| Cpip_XP_039452297    | -----EN--NN-----NS-----                                    |
| Asus_D_AEF30451      | ----NTPAFQYPPPPASPCCHVHSPSP--YT-----GSG-GGG-----           |
| Bdor_D_AHX71830      | ----AT-AFQYPPPPASPCQVHSPSP--YT-----GGG-GGGGGGAGVGNG-----   |
| Lser_D_AKA64736      | ---GAPVFQYTPPPSPSCSIHGPS--YT-----G-----G-----              |
| Bodo_D_KAG4071353    | LL-QATPSCLSPPSSPSCCHRN-N--YR-----G-----                    |
| Aste_XP_035899618    | DG-PPTPLSQSPPSAS--CSPFTTG--AY-----Y--GSG-----              |
| Agam_GIBN01014598    | DV-PTTPLSQSPPSAS--CSPFANG--NF-----F--GSG-----              |
| Aalb_D_XP_029727134  | DT-PSTPISQSPQSSS--CSPFTTG--YY-----NSG-GGG-----SAGYAN       |
| Aaeg_XP_021705280    | DT-PSTPISQSPQSSS--CSPFTTG--YY-----NSGGGGG-----SAGFVN       |
| Cpip_XP_039434833    | DT-PSTPISQSPQSSS--CSPFTTG--YY-----NTP-PGG-----             |
| Aaeg_mx_ABD47742     | -----QVSL-----HH-                                          |
| Aalb_mx_AAW72439     | -----QVSI-----HH-                                          |
| Cpip_mx_XP_039452301 | -----QVSI-----HH-                                          |
| Agam_mx_ABD47743     | -----AGS-----T----Q-----QQHQ-----QH-                       |
| Aste_mx_XP_035892327 | -----ASS-----SYYTAPA-----PQHA-----QH-                      |
| Aaeg_GFNA01179070    | -----SDL-----S-----Q-----QVCAEAEVAEL-                      |

|                     |                                                      |
|---------------------|------------------------------------------------------|
| Aalb_GCLM01039770   | -----SNV-----S-----Q-----QVCA-AEAVA EY-              |
| Cpip_XP_039438427   | -----TNV-----S-----Q-----QVRL-S---AEN-               |
| Aaeg_XP_021695521   | -----NNC--ALHGS-----NNGGGGGGDGESGVSGGEQQSSA-T---MVNS |
| Aalb_XP_029730094   | -----NNC--ALHG-----GGGGESGENGVE--QQQSSA-T---VAHS     |
| Cpip_XP_039452297   | -----NNC--ALHGS-----S-----PLTA-D---VVN-              |
| Asus_D_AEF30451     | ----EVFFPPSRST-----P----R-----TPRT-S---VSF-          |
| Bdor_D_AHX71830     | ----EVFFPLSLST-----P----R-----TPRT-S---VSY-          |
| Lser_D_AKA64736     | ----EVFFPRSRST-----P----R-----IPRT-S---VSF-          |
| Bodo_D_KAG4071353   | ----DVFFPQTHSS-----P----R-----TPSA-S-----            |
| Aste_XP_035899618   | ----QVFFP RTPANT-----AN-                             |
| Agam_GIBN01014598   | ----QVFFP RTPANT-----AN-                             |
| Aalb_D_XP_029727134 | ATTGTGQVFFPQTPNGVFR---P-----GGG-                     |
| Aaeg_XP_021705280   | TGTTSQVFFPQTPNGVYR---P-----S---                      |
| Cpip_XP_039434833   | ----QVFFPQTPSGVLP---P----R-----TPNA-T---GGG-         |

|                      |                                                            |
|----------------------|------------------------------------------------------------|
| Aaeg_mx_ABD47742     | -N---RYH---LVQ--A-FHE-----ILFR--HAQ-----                   |
| Aalb_mx_AAW72439     | -N---RYH---LVQ--A-FHE-----ILFR--HAQ-----                   |
| Cpip_mx_XP_039452301 | -N---RYH---LVQ--A-FHE-----ILFR--HAQ-----                   |
| Agam_mx_ABD47743     | -HHQHQR FQ---VVR--AVLHD-----ILFR--HLL-----                 |
| Aste_mx_XP_035892327 | -H---RFW---MLR--GILYN-----ILFR--HLL-----                   |
| Aaeg_GFNA01179070    | -Q---R-H---HLM--VVFHE-----ILVA--YAR-----                   |
| Aalb_GCLM01039770    | -Q---R-Q---HLI--AVFHE-----ILVA--YAR-----                   |
| Cpip_XP_039438427    | -G---Q-H---RLV--AAFHQ-----ILAA--YAR-----                   |
| Aaeg_XP_021695521    | SN---R-Q---LMR--VLHQ-----VLYR--YTM-----                    |
| Aalb_XP_029730094    | SN---R-Q---LMR--VLHQ-----VLYR--YTM-----                    |
| Cpip_XP_039452297    | -N---R-Q---LMR--VVLHQ-----VLYR--CTM-----                   |
| Asus_D_AEF30451      | -A---A-G---EEN--TFFRQ-----H--NISGGYSSTQHLQPPQSAPPMPPS      |
| Bdor_D_AHX71830      | -A---A-G---EEN--TFFRH-----H--NISGGCSNASHL-QPPQSAPPMPPS     |
| Lser_D_AKA64736      | -A---P-G---DEV--NFFHQ-----SAPAASSGNAQTQTT-QAPQSAPPVPNS     |
| Bodo_D_KAG4071353    | -----                                                      |
| Aste_XP_035899618    | -G---R-N---GAR--VFFHQT--PGQ--Q--YPQV---PQSQ-PTPGSA---NS    |
| Agam_GIBN01014598    | -G---R-N---GAR--VFFQQT PNP GP--Q--YTPVGNSQSQQQ-PPPGSA---NS |
| Aalb_D_XP_029727134  | -G---G-GIGSYGATTGVFFGQP--P-----T-PSPSGS---SS               |
| Aaeg_XP_021705280    | -----GVGSFG-TTGVFFGQP--P-----T-PSPSGS---SS                 |
| Cpip_XP_039434833    | -G---R-G---GAR--IFFGQ--P-----T-PSPSGS---SS                 |
| Aaeg_mx_ABD47742     | -----E--N--N-----P-----                                    |
| Aalb_mx_AAW72439     | -----E--N--N-----P-----                                    |
| Cpip_mx_XP_039452301 | -----E--N--S-----P-----                                    |
| Agam_mx_ABD47743     | -----D--T--S-----A-----                                    |
| Aste_mx_XP_035892327 | -----D--N--D-----P-----                                    |
| Aaeg_GFNA01179070    | -----E--AALAQHSPNPKALP-----                                |
| Aalb_GCLM01039770    | -----E--AALAQHSPNPKALPP-----                               |
| Cpip_XP_039438427    | -----H--AILAQEQQT TTTT-----                                |

|                      |                                                          |
|----------------------|----------------------------------------------------------|
| Aaeg_XP_021695521    | -----E--GVLS-----P-----                                  |
| Aalb_XP_029730094    | -----E--GVLS-----P-----                                  |
| Cpip_XP_039452297    | -----E--GALS-----P-----                                  |
| Asus_D_AEF30451      | SHTSAHSQ--T--T-----P-Q----Q-Y-QQYSYPHYQYTPPPTPLTANASTCT  |
| Bdor_D_AHX71830      | SHNGAHSQ--P--A-----P-Q----QQY-QQYTPYQYTPPPTPLTANASTCT    |
| Lser_D_AKA64736      | HHHNQHQLYGH--H-----P-H----FAY-QHSGPNYYQYTPPPTP---NA----  |
| Bodo_D_KAG4071353    | -----                                                    |
| Aste_XP_035899618    | HSSSSGVS--S--S-----L-D----TPS-CSSGTPHYHH-----            |
| Agam_GIBN01014598    | HSSSSGVS--S--S-----V-D----TPS-CSSGTPHYHQ-----            |
| Aalb_D_XP_029727134  | H-S-QHSA--N--S-----P-D----TAA-CSSAPPIHQFPSSYQ---LP----   |
| Aaeg_XP_021705280    | HSS-QHSA--N--S-----P-E----TPA-CSSAPPIHQFPSSYQ---LP----   |
| Cpip_XP_039434833    | YSSSQHSA--N--S-----P-DASHTTTPASCSSAAPIFHQFPSSFS---GP---- |
| Aaeg_mx_ABD47742     | -----TR-----SR--                                         |
| Aalb_mx_AAW72439     | -----TR-----SR--                                         |
| Cpip_mx_XP_039452301 | -----TR-----TR--                                         |
| Agam_mx_ABD47743     | -----SAPKKKKRKPKPRIYNNNNYYNYCRNISHHFLR--                 |
| Aste_mx_XP_035892327 | -----AC-----IR--                                         |
| Aaeg_GFNA01179070    | -----TT-----EP--                                         |
| Aalb_GCLM01039770    | -----TT-----EP--                                         |
| Cpip_XP_039438427    | -----TS-----VPPP                                         |
| Aaeg_XP_021695521    | -----AQ-----TS--                                         |
| Aalb_XP_029730094    | -----AQ-----TS--                                         |
| Cpip_XP_039452297    | -----AH-----TS--                                         |
| Asus_D_AEF30451      | GNVFGSTEATTHQRTCVC--ASTSTS-----TQ--                      |
| Bdor_D_AHX71830      | GNIFGATEATTHQRCVATASTSTS-----TT--                        |
| Lser_D_AKA64736      | -----ATATTSTG-----TS--                                   |
| Bodo_D_KAG4071353    | -----D-----TS--                                          |
| Aste_XP_035899618    | -----                                                    |
| Agam_GIBN01014598    | -----                                                    |
| Aalb_D_XP_029727134  | -----STSNASTA-----TN--                                   |
| Aaeg_XP_021705280    | -----STANASTT-----TN--                                   |
| Cpip_XP_039434833    | -----TADGGST-----TS--                                    |
| Aaeg_mx_ABD47742     | -CLLCNK-----LYYLLRKVY-----                               |
| Aalb_mx_AAW72439     | -CLLCNK-----LYYLLRKVY-----                               |
| Cpip_mx_XP_039452301 | -CLLCNK-----LYYLLRKVY-----                               |
| Agam_mx_ABD47743     | -CFYRHK--DDEEGGGRLPIETPRH-----                           |
| Aste_mx_XP_035892327 | -CVFCHK-----LLRMLRNIC-----                               |
| Aaeg_GFNA01179070    | -CLLCCK-----LYYLFRRFY-----                               |
| Aalb_GCLM01039770    | -CLLCCK-----LCYLFRRFY-----                               |
| Cpip_XP_039438427    | SCVQCEK-----LHYLLRLLH-----                               |
| Aaeg_XP_021695521    | -CVFCNR-----LYYLFQLLY-----                               |
| Aalb_XP_029730094    | -CVFCNR-----IYYLFQLLY-----                               |

|                      |                                                            |
|----------------------|------------------------------------------------------------|
| Cpip_XP_039452297    | -CVFCNK-----IYYLFQLLY-----                                 |
| Asus_D_AEF30451      | -SCMAKG-----HARLHRFSDAQKRSRRTSTTNDDERECHSEHETSWDEF--       |
| Bdor_D_AHX71830      | -SCGMGG-----HSRLHRSLSDAQKRSRRTSTTNDDEREYHSEHETSWDEF--      |
| Lser_D_AKA64736      | -TSGAGGMA-----HRSLHRSLSDSARRSRLTS-TGEDEREYQSEHETSWDEF--    |
| Bodo_D_KAG4071353    | -QCW-----RSRANGLRR-RLHS-TGDDT---HDDAESS-DEFMS              |
| Aste_XP_035899618    | ----GQ-----LQPIQFNWHDD-----GDSS---ESEGSSS--QTTS            |
| Agam_GIBN01014598    | ----GQ-----LQPIQFNWHDD-----GDSS---ESEASTS--QATS            |
| Aalb_D_XP_029727134  | -WTH-----VS---S--GD-----GDDS---SESDSS--QPSS                |
| Aaeg_XP_021705280    | -WSHHGG-----PS---G--HD-----GDES---SESDSS--QPSS             |
| Cpip_XP_039434833    | -PAMAGQ-----PT---SWPDD-----GSES---SESDSS--QPSS             |
| Aaeg_mx_ABD47742     | -----                                                      |
| Aalb_mx_AAW72439     | -----                                                      |
| Cpip_mx_XP_039452301 | -----                                                      |
| Agam_mx_ABD47743     | -----                                                      |
| Aste_mx_XP_035892327 | -----                                                      |
| Aaeg_GFNA01179070    | -----                                                      |
| Aalb_GCLM01039770    | -----                                                      |
| Cpip_XP_039438427    | -----                                                      |
| Aaeg_XP_021695521    | -----                                                      |
| Aalb_XP_029730094    | -----                                                      |
| Cpip_XP_039452297    | -----                                                      |
| Asus_D_AEF30451      | -----                                                      |
| Bdor_D_AHX71830      | -----                                                      |
| Lser_D_AKA64736      | -----                                                      |
| Bodo_D_KAG4071353    | AN-----GC-----                                             |
| Aste_XP_035899618    | SS-----GCNPHCLG-TM-----DGGASSSSY                           |
| Agam_GIBN01014598    | SS-----GCSPHCLG--M-----DGSGPSSSF                           |
| Aalb_D_XP_029727134  | ASDGDSITAPI---AGCSPHCLGL-LGPPH---HHLHQLLDAAAAAGSGSSTGVSSSF |
| Aaeg_XP_021705280    | ISEGDTIAAPI---AACSPHCLGL-LPGAH---HH--LLDA-----GSSTSTST--   |
| Cpip_XP_039434833    | SSE---AAPTGSSPTGCSSHCLG--LGQLHQHRLHHHQQLDV-----GGGGGPS---  |
| Aaeg_mx_ABD47742     | -----                                                      |
| Aalb_mx_AAW72439     | -----                                                      |
| Cpip_mx_XP_039452301 | -----                                                      |
| Agam_mx_ABD47743     | -----                                                      |
| Aste_mx_XP_035892327 | -----                                                      |
| Aaeg_GFNA01179070    | -----                                                      |
| Aalb_GCLM01039770    | -----                                                      |
| Cpip_XP_039438427    | -----                                                      |
| Aaeg_XP_021695521    | -----                                                      |
| Aalb_XP_029730094    | -----                                                      |
| Cpip_XP_039452297    | -----                                                      |
| Asus_D_AEF30451      | -----DDRYDNFTAGRERLQEFNGRIPPRKKK-                          |

|                     |                                                            |
|---------------------|------------------------------------------------------------|
| Bdor_D_AHX71830     | -----DDRYDNFTAGRERLQEFNGRIPPRKKK-                          |
| Lser_D_AKA64736     | -----EDRYDNFTAGRERLQEFNGRIPPRKKK-                          |
| Bodo_D_KAG4071353   | NVPRQS-----VPVDYDLEEHY-TYLAAREHLQPFSGQVPPKKKK-             |
| Aste_XP_035899618   | SVPSSANLI---SPSSSGGTLYASVPPHLD-----YMAGREQLQEFPGKIPQRKRK-  |
| Agam_GIBN01014598   | STPSSSTVM---SPSSSGGTLYAAVPPHLD-----YMAGREQLQEFPGKIPQRKRK-  |
| Aalb_D_XP_029727134 | NNGSSSSSSNSAGGSSAMVPMMSGCIPPHLD-----YMAGREQLQEFAGKIPQRKKKS |
| Aaeg_XP_021705280   | -IGANSSSS---GSSSTMATMSGYIPPHLD-----YMAGREQLQEFAGKIPQRKKKS  |
| Cpip_XP_039434833   | -----GFIPPHLD-----FMAGREQLQEFAGKIPQRKKK-                   |

|                      |                                                         |
|----------------------|---------------------------------------------------------|
| Aaeg_mx_ABD47742     | -----                                                   |
| Aalb_mx_AAW72439     | -----                                                   |
| Cpip_mx_XP_039452301 | -----                                                   |
| Agam_mx_ABD47743     | -----                                                   |
| Aste_mx_XP_035892327 | -----                                                   |
| Aaeg_GFNA01179070    | -----                                                   |
| Aalb_GCLM01039770    | -----                                                   |
| Cpip_XP_039438427    | -----                                                   |
| Aaeg_XP_021695521    | -----                                                   |
| Aalb_XP_029730094    | -----                                                   |
| Cpip_XP_039452297    | -----                                                   |
| Asus_D_AEF30451      | --KDVP-KS-----KSEKK---QFKAF----IWP-TVVTVI-VVAMGCGFLVAR  |
| Bdor_D_AHX71830      | --KDVP-KS-----KYEKKVRERPFKGF----IWP-TVVTVI-VVAIGCGFLVTR |
| Lser_D_AKA64736      | --KDVP-KT-----KPEKK---E-QSF----TWP-AVVTVF-VFAMGCGFLVAR  |
| Bodo_D_KAG4071353    | --RVVE-HTEADSPVATKSKSG---R-QGG----YYA-NYLQI-----        |
| Aste_XP_035899618    | ----S-RT-----PKPK---K-AGLLEQPLMWQ-MAVTAAALIVLGCGLAAR    |
| Agam_GIBN01014598    | ----S-RT-----PKPK---K-PGFLEQPLMWQ-MAVTAA-LIVLGCGLAAR    |
| Aalb_D_XP_029727134  | SS---S-KS-----SSKSK---K-SKFLEQTLVWPTLAVTAT-LIALGCGLAAR  |
| Aaeg_XP_021705280    | SS---SSKS-----SSKSK---K-SKFLEQTLVWPTLAVTAT-LIALGCGLAAR  |
| Cpip_XP_039434833    | ----S-KA-----GGKSK---K-AGFLEQTLVWPTLAVTAT-LIALGCGLAAR   |
