# Supplementary material for: Deep Conservation of Hid-Like RHG Gene Family Homologs in Winged Insects Revealed by “Taxon Hopping” BLAST
Source: MDPI journal article supplement (doi:10.3390/insects12110957), 2021-10-21
Supplement: s1 [file s1]

|                         |                                                              |     |
|-------------------------|--------------------------------------------------------------|-----|
| Tcas_C_XP_008194456.1   | MAVPFVLPEDINNLIIVAV--IFILS----QTRLQRNEENRELQE-----CMEE       | 43  |
| Atum_C_XP_019872614.1   | MAVPFNPEDHNEVDVIVNQLQSLLT-QLQASVRESQRSTRTRNP-----PGSTRH      | 50  |
| Rfer_C_KAF7270649       | MAVPFIIIPDDQNDQSVILVQLQTLIS-RLQMIHNNQQQQQLSVN-----ASSNSYNNS  | 53  |
| Sory_C_XP_030755961     | MAVPFTMPDDQNEVEVLLIQLQALLT-KLQIAARKHRLRSQQAQSNQSAAVATLTTTAPL | 59  |
| Dpon_C_XP_019765467.1   | MAVPFNIPEDQSEVEVLLIQLQTLN-KLQATVRQNHQLAQ-QP-----TASIPSGS     | 50  |
| Dvir_C_XP_028151061.1   | MAIPFNLPGEQTEVEVITQLQYLLM-KLQDAIRRSQATNSSYP-----VFSISTR      | 51  |
| Ldec_C_XP_023021532.1   | MAVPFVMPEDENEVEVIIQLQSLLT-KLQAALRRSRGPPPPRT-----SLPT---R     | 48  |
| Apla_C_XP_018573717.1   | MAVPFNPEDQNEVEVIINQLQSLLT-KLQAARRSRGPTIRTN-----QTAV---T      | 48  |
| Obor_C_KRT86088.1       | MAIPFTIPNQEVSQLN-IQELLRELCEILQQLLIICRQQSINQQQ-----QQAT       | 48  |
| Otau_C_XP_022915163.1   | MAIPFAVPGQPPV---SPERLRELYDFLQQLLIVRQQQNHHRQE-----EVVT        | 45  |
| Nves_C_XP_017785459.1   | MAIPFDVLNDEEGDPA-LNELLSQLCDAIICLRVHSH---IQFA-----            | 41  |
| Aplani_C_XP_018330969.1 | MAIPFDVSSDEK----LDQLFTRLYEILQQIYHLTQQTASGQQP-----TI-T        | 43  |
| Ppyr_C_XP_031336702.1   | MAIPFNVENDSDCDEAVLQLLLSLCRTLQQIALFQSRRTQNLN-----RAPS         | 49  |
| Illum_C_KAF2880729.1    | MAIPFLVEDDSEYEEALLQQLYSYDLFHTIQQIELIQRSRRAQHQI-----SPRV      | 49  |
| Ater_C_KAF5276935.1     | MAVPFTVEDESNDYEIVLQQLFSDLRQTLQQIVDMQRLRRTQNLN-----ATTR       | 49  |
|                         | **:** :                                                      | :   |
|                         |                                                              |     |
| Tcas_C_XP_008194456.1   | LVRLLAEELQRRSRS-----SEYDNQLKQTL-----LLLRQS-----              | 75  |
| Atum_C_XP_019872614.1   | RVRFASGTRD-RDPERQEET-----DGDGRPSHEHLADLM-----VCRHDVPSAS      | 94  |
| Rfer_C_KAF7270649       | RVRSSSTTRQ-RTRDSSE-----TSSTTPNQNNLSEVISN--LSLFALSAGDQQSSS    | 102 |
| Sory_C_XP_030755961     | RVRGSSINRQ-RSESSET-----AASPAQTNAIPDLISN--LSWLASSHNETQAAS     | 108 |
| Dpon_C_XP_019765467.1   | RVRYPDDRVR-RSREVLQ-----SVERITPVPQNVLPDLLSN--LSWLADSSNEASSSS  | 101 |
| Dvir_C_XP_028151061.1   | RVRTNSSNRA-RGREQSSVSSPSTASPSANANLPELLNN--LAWLAVLTQEAVDNN     | 108 |
| Ldec_C_XP_023021532.1   | NRTSAGSSRS-PTQDQGT-----STSASAPSTQIPDLLNN--LALLAAASQEIQSN     | 97  |
| Apla_C_XP_018573717.1   | RVRSPASSRL-RSRD-ES-----SATTSISSTNFPDLLNN--IAWLAAASQDAASTS    | 96  |
| Obor_C_KRT86088.1       | RNRASTSSVV--NQH-----DPIPEIMTN--LSLLSAA-----                  | 77  |
| Otau_C_XP_022915163.1   | TRREDTTSVR--ASG-----RAADG-----RMLSAL-----                    | 69  |
| Nves_C_XP_017785459.1   | ----SRGSSL-NPQRI-----REAFGPHPNVLERLSRNLLPLPDVVGERTD          | 82  |
| Aplani_C_XP_018330969.1 | RVRCSAGASR----HIQD-----HQIHSSYPVLPPEIVND--LALLPRPSAQYLEGE    | 89  |
| Ppyr_C_XP_031336702.1   | SP--ATTTS----RHSGA-----S---SETERTLLNSTVD--LALSLSQ-----V      | 83  |
| Illum_C_KAF2880729.1    | RTTPSAGTSR-RNREVPG-----DPLDSENLAPEPVVNLA--LALSPAGSQNDL--D    | 96  |
| Ater_C_KAF5276935.1     | AT-----SIR-RPREHGT-----QTEFSEA---LFNSTVN--LALSPAGAQNGL--E    | 88  |

|                         |                                                              |     |
|-------------------------|--------------------------------------------------------------|-----|
| Tcas_C_XP_008194456.1   | -----LSHFTPTLSR-IQRRSNFESCCDDCKISLH-----EDCATKDCSQVGL        | 117 |
| Atum_C_XP_019872614.1   | -----TQLTASPIRRRTTRFQTDCEDETKINIT-----TIVDT-GSQQDWAQIGI      | 137 |
| Rfer_C_KAF7270649       | -----TYTAIPVRSRPRTRG-CSESSNCDVTKTATK-----T-----TFDQDWNKMNC   | 143 |
| Sory_C_XP_030755961     | -----ALTAMPVRSRPRRRTNSESSNCDKTTKTTT-----T-----DLSQDWNKVNC    | 150 |
| Dpon_C_XP_019765467.1   | SPL-----T-AMSARSRRRTASESSNPDETKISVT-----AIVTTDFCAQDWEKNC     | 148 |
| Dvir_C_XP_028151061.1   | SQ-----QTTAMAVPRPTRNRRTSSESSCCQETKSDET-----TASNS-GSVQAWNQETD | 156 |
| Ldec_C_XP_023021532.1   | QPEGAPQVAASATFRSTRRRRTNSESSCCEESKVSIT-----TA-NR-NGVQDWNQVNE  | 148 |
| Agla_C_XP_018573717.1   | S-----SLTANSVTRSPRRRTSSESSNCKETKISIT-----AI--V-NHAQDWNQADG   | 141 |
| Obor_C_KRT86088.1       | --FNSIQTTPARALRRPRRYRLSESSCDETKNFDHQTSTTTSPTTSAQISPEWMEVDM   | 135 |
| Otau_C_XP_022915163.1   | --SDA-----LHTSRRPRRRWPKSPTHH-----DDSSNSNSAAKEAQNQRWKRVT      | 113 |
| Nves_C_XP_017785459.1   | -VSL--QTIEASAIIPGRQRRTSESSCKVPKIANM-----QTPIDQPQ-DYSEDD      | 130 |
| Aplani_C_XP_018330969.1 | -AVLQPQ--AMPTPRRRKRRRTSSKSCCDANKSVEA-----ATVEDDGHQVWTQVGM    | 138 |
| Ppyr_C_XP_031336702.1   | -EALQQQNASVSTRRRHPRRSRSEPSCKEKPVI-----SVAVEVTNKDWIQKEH       | 134 |
| Illum_C_KAF2880729.1    | -AILRPQNLSTPTRRRRRRTRRSEPSCEENKPKVKV-----SVSVEVTNKEWNQQEK    | 147 |
| Ater_C_KAF5276935.1     | -MLLQLESFLPVRRLHRRRSQSEPPFCKEVKPKVKV-----SVSVEVGKNDWIIQQEQ   | 139 |

|                         |                                                            |     |
|-------------------------|------------------------------------------------------------|-----|
| Tcas_C_XP_008194456.1   | ILRKIDDETSIAIFKEGVEEE-----KEGFVEESLLSRLVPRVR---            | 156 |
| Atum_C_XP_019872614.1   | TLRNIADDINPVTFREVV-----LFPTTKRGLLSKL-PDALT-C               | 174 |
| Rfer_C_KAF7270649       | NNGDDDDDDDDDE-----NKEASSVGLLSKLTPASVSSC                    | 177 |
| Sory_C_XP_030755961     | DDDGDD-----EGGSSDGLLSKIMPATVSSC                            | 176 |
| Dpon_C_XP_019765467.1   | VD-----SGT-----SNVIPADGLFSKLIPGPVSSC                       | 174 |
| Dvir_C_XP_028151061.1   | NEQSSE----DGS-----DKSYSRQGILSRLIPGPVS-A                    | 185 |
| Ldec_C_XP_023021532.1   | PE-----ISS-----AKTLSSSESIFSKFVPGPVS-A                      | 173 |
| Agla_C_XP_018573717.1   | SP-----DSE-----PEQASGDGILSKFVPGPVS-A                       | 166 |
| Obor_C_KRT86088.1       | DLRKISEDFAAGFHKDDDAEEEDTTALQSSSKSSSSPSTSTKRDSIFSKEVPAPF-TG | 194 |
| Otau_C_XP_022915163.1   | ELRKIADEFESAAFEVDDVDVDSLLP-----CCSRLSTSKERKGTFSKILSMPVMVS  | 167 |
| Nves_C_XP_017785459.1   | -----P-----SSQRPKTRTACDGDGLSTLVPSPi-KT                     | 158 |
| Aplani_C_XP_018330969.1 | PLLKMAKDFDPSEQQFTCKEK-ND-----DEVTGAKEDSCQSESIFSKLVPDLS-SK  | 188 |
| Ppyr_C_XP_031336702.1   | -----HISPTTKKPWYRSDGLLSKLIPAPL-SG                          | 161 |
| Illum_C_KAF2880729.1    | -----SSQSSPDKQSCGSESLLSKLVPAPF-SG                          | 174 |
| Ater_C_KAF5276935.1     | -----STETSTKKKWCSENLLSKLVPAPF-SG                           | 166 |

. : \* :

|                         |                              |
|-------------------------|------------------------------|
| Tcas_C_XP_008194456.1   | TFWKAVPLICVVGHLHLFQISYSM 179 |
| Atum_C_XP_019872614.1   | TIWTA--MLGCVGWHLFRSR--- 192  |
| Rfer_C_KAF7270649       | SLMTA--VICFVGWHIFRGR--- 195  |
| Sory_C_XP_030755961     | SFMTA--MICFVGWHIFCGR--- 194  |
| Dpon_C_XP_019765467.1   | SLMTA--MICFVGWHIFRAR--- 192  |
| Dvir_C_XP_028151061.1   | PLFTA--MICFVGWHIFRAR--- 203  |
| Ldec_C_XP_023021532.1   | PLWTA--MICFVGWHLFGTR--- 191  |
| Agla_C_XP_018573717.1   | PLWTA--MICFVGWHLFRAR--- 184  |
| Obor_C_KRT86088.1       | SICTA--VICVVGWHLRLNR--- 212  |
| Otau_C_XP_022915163.1   | SICTA--VLC-VGWHLRLNR--- 184  |
| Nves_C_XP_017785459.1   | SIWTA--VICA VGWYMFAR--- 176  |
| Aplani_C_XP_018330969.1 | SIWTA--VICVVGWHLRLRTR--- 206 |
| Ppyr_C_XP_031336702.1   | PLWTA--VICMVGWHLRLRTR--- 179 |
| Ilum_C_KAF2880729.1     | PLWTA--VICVVGWHLRLRTR--- 192 |
| Ater_C_KAF5276935.1     | PLWTA--VICVVGWHLRLRTR--- 184 |
|                         | : .* :: ** :::               |
