# Supplementary material for: Deep Conservation of Hid-Like RHG Gene Family Homologs in Winged Insects Revealed by “Taxon Hopping” BLAST
Source: MDPI journal article supplement (doi:10.3390/insects12110957), 2021-10-21
Supplement: s1 [file s1]

|                       |                                                               |     |
|-----------------------|---------------------------------------------------------------|-----|
| Bger_D_PSN4072400     | MAIPFRLPTQQETDDNYQILDQLIDQLYHIVRQIILRRGRVVEEAPVPPASTSGYDFS LI | 60  |
| Csec_D_XP_02371120400 | MAIPFNLPTQQDTEENYDILDQLLEQLYEVMLEILRQRRRLRDQL-----YETMLE      | 50  |
| Znev_D_XP_02192701300 | MAIPFNLPTQETEDNYEIMDQLLEQLYEIVRQIILRRRR-----                  | 40  |
|                       | ****.***:*:*:*:*:*:*:*:*:*:*:*:*:*:*:*:*:*:*:*                |     |
| Bger_D_PSN4072400     | VYLVKASEIRQVSGNVSGQVL----ATVIRIGACGKRWLVPGRRPTGCRFIPGDRXXXMQ  | 116 |
| Csec_D_XP_02371120400 | -ILRQRRRLRDSRSAIPTTLMPHNREAQRRENDAD-----GGNGSGEPEPSGSQNQQQA   | 103 |
| Znev_D_XP_02192701300 | -----SRGADNRTGIPA-PEPRNRDTQTRDGGGG-----GGNEAGRS DPSVNGNQEQG   | 87  |
|                       | . : : : * . . * . : *                                         |     |
| Bger_D_PSN4072400     | LNQD-LDLSLPLPDIVLSTGFPESGFSGRAPVPPRRFAPAT---ERPQPPRRRPRRR     | 172 |
| Csec_D_XP_02371120400 | LNRDAMLRVLPQPDVVSNPPT--R-SAQSEVPIPPRRCTPAGGVRVRPCPPRRSRRS     | 159 |
| Znev_D_XP_02192701300 | IGNDAMRRI PALPDIVPITDI--RAAAPSDAPVPPRRGTPEGGVRPRPRRPPRRPRRR   | 144 |
|                       | :..* : **:* : * .*:***** :* ** **** **                        |     |
| Bger_D_PSN4072400     | RPVDKRRKREDTPEDTRPDQRQRENWLQVGKELRKIADGFRASNSSLQEDGGNRSSTDIEA | 232 |
| Csec_D_XP_02371120400 | -RSTS--SNEKTSAPVPTDNRTRENWQEVGKELRKIADQFCASS--PEEEGPQTTRHLHN  | 214 |
| Znev_D_XP_02192701300 | TSSCC--CNEKKQGVPNDDRTTENWKEVGKDLRKIADEFCTSSR--LEGEQTQTAPHLHN  | 200 |
|                       | ::. . . *:* *** :***:***** * :*. * * ::. :..                  |     |
| Bger_D_PSN4072400     | MKKEQSLLSLLVPAPFRGSLWTAVIFLVGWRILAGRVW                        | 270 |
| Csec_D_XP_02371120400 | TKKEESLLSLLLPSRLRGPVWTAVIILVGWRFLASSGW                        | 252 |
| Znev_D_XP_02192701300 | KKKEEGLSLLLPRLGGSMWTAVIILVGWRFLASSGW                          | 238 |
|                       | ***:..*****:* : * :*****:*****:*. *                           |     |
