# Supplementary material for: Deep Conservation of Hid-Like RHG Gene Family Homologs in Winged Insects Revealed by “Taxon Hopping” BLAST
Source: MDPI journal article supplement (doi:10.3390/insects12110957), 2021-10-21
Supplement: s1 [file s1]

|                        |                                                               |     |
|------------------------|---------------------------------------------------------------|-----|
| Clec_HE_XP_014239966.1 | MAVPFNVPEEEAEERRVIRIP-----ICEFIRQFIQPE-----ISNLQPENP-----     | 42  |
| Btac_HE_XP_018898908.1 | MAIPFNLPSDEETEDHYKRRLDQLLKDLYDVLRLQILFRPRPIHDDD-----          | 45  |
| Lstr_HE_RZF36208.1     | MAIPFNLPSDEEDTEEYYRRLDQLLADLYDVLRLHILFRPRTQQPAHHNQQA-PVVDAGH  | 59  |
| Nlug_HE_XP_022189933.1 | MAIPFNLPSDEEDTEEYYRRLDQLLADLYDVLRLHILFRPRTQQPAHHNQ-QP-PVIDADG | 58  |
| Btac_HE_XP_018895589.1 | MAIPFHLPSDEETEENYRRLDQLLADLYDVLRLQILLRPRHMQAPSTRIVENTGFTTESE- | 59  |
| Aluc_HE_KAF6204998.1   | MAIPFNLPSDEETEDAYRRIDQLLLDLYDLLRQIILRQRPVQNERGVSEARISPTWD-E-  | 58  |
| Ofas_HE_GCXY01041673.1 | MAIPFNWPSDEETEDHYRRLDQLLLDLYDVLRLQILLRRRLHPVPQPE--AQPVPLHEHL- | 57  |
| Hhal_HE_XP_014287364.1 | MAIPFNLPSDEETADNYRRLDQLLLDLYEVLRLQILLRRRIERVAGPI--ERY-----    | 50  |
|                        | **:**: *.:* *: : :.:*:::                                      |     |
| Clec_HE_XP_014239966.1 | -----RPE--GPVILVLPEAVLRA-----                                 | 59  |
| Btac_HE_XP_018898908.1 | -----LTGFEARLLALPDLVQSAMSNYPAAATATAHSPWSAIGARD                | 87  |
| Lstr_HE_RZF36208.1     | DNESEDHEPPDHGGEDPSPDALEQRLHPLPDLVANVGSSSAAP-SR-----           | 104 |
| Nlug_HE_XP_022189933.1 | DNESEDQEPDPDHGGEDPSPDALEQRLHPLPDLVANVGSSSAAPSSR-----          | 104 |
| Btac_HE_XP_018895589.1 | -----QDFEPPSDSDLVQERLMALPDLVRSAMSPALNNLSNRLQESNLEC-----       | 104 |
| Aluc_HE_KAF6204998.1   | -----QAASMATQTVETTRLESRLPDLIADTLPSLVANTRQSL-----              | 96  |
| Ofas_HE_GCXY01041673.1 | -----QPQGLQRQQLFRRQARRPDLPLIPSA-----NPIA-----                 | 88  |
| Hhal_HE_XP_014287364.1 | -----PQQPQPQPQPGLPDLVP-----                                   | 68  |
|                        | **: :                                                         |     |
| Clec_HE_XP_014239966.1 | -----RKAPAAPRRRRRRRQ-----                                     | 73  |
| Btac_HE_XP_018898908.1 | DAADETNGSRHCRHRHCHTPKRVDLTVAT-VARVDAGGGGHLHLRPPAPPPRPPPGSQS   | 146 |
| Lstr_HE_RZF36208.1     | -----PLGRGHPRRHQDDRRRRRDSTT---TPDDSRSLSP---EDQR-PPPPRKPRESKK  | 151 |
| Nlug_HE_XP_022189933.1 | -----PLGRGHPRRRRRDSTSDSVTINNSRMTSNSRTTDDEEVVDP-PRPLRKLRRESKK  | 157 |
| Btac_HE_XP_018895589.1 | -HCDSSSTVSPSTPVSLPRHQSQSDEVDP--MQRP-----RPATRNL               | 143 |
| Aluc_HE_KAF6204998.1   | -----PLVRKSSSLVPQRRRRRR--AEKP--LRRYAR-----IQT-----            | 126 |
| Ofas_HE_GCXY01041673.1 | -----PLSRKPPVPPPRRRRRR--SDAK--HHSNLQ-----EQQQSHQQ             | 123 |
| Hhal_HE_XP_014287364.1 | -----EGRRPPVPPPRRRRRR--CPKA--QHQLD-----RQ-----                | 95  |
| Clec_HE_XP_014239966.1 | -----EKHPQEMPQQHTLSLGIELRHVEEHTYQS-                           | 102 |
| Btac_HE_XP_018898908.1 | GPEPLPRLGPGSATTKFPSKDADSPSSGPAPGKPHTRHKRWTQVGEELRGIAEDFRSNL   | 206 |
| Lstr_HE_RZF36208.1     | RCSSLRR-----KAPCCPASLKFSHSLKTSAENWVMVGEELRKIAEDFRSKT          | 198 |
| Nlug_HE_XP_022189933.1 | RCSSLRR-----KPCCPASLKFSHSLKTSAENWVMVGEELRKIAEDFRTKS           | 203 |
| Btac_HE_XP_018895589.1 | NKRSLSLSP-----K-RYLSKLPHSSMKTLRPQKKWVHVGEELRSIAEDFRSTF        | 189 |
| Aluc_HE_KAF6204998.1   | -----TPYDDLRAAPPQVVAASSWLVNGIELRQIAEEITFIS                    | 162 |
| Ofas_HE_GCXY01041673.1 | QHHSLSQH-----RQESAAARADSAIADLQQGPSWLVNGIELRQIAEEFRSAQ         | 170 |
| Hhal_HE_XP_014287364.1 | -DNSVM-----HQDPTPQQGPSWLVNGIELRQIAEEFRSTQ                     | 130 |
|                        | :* *** :*.                                                    |     |

|                        |                                                              |     |
|------------------------|--------------------------------------------------------------|-----|
| Clec_HE_XP_014239966.1 | -----VGQTKRRRESKTSSFFSLLLPTPLPGSIWTTVIILVGW                  | 141 |
| Btac_HE_XP_018898908.1 | S-----VRSSRHLPMEKASHLFSLLIPATM-GPVWTTVILLIFP                 | 245 |
| Lstr_HE_RZF36208.1     | TTTTTT---SRSDSSQLKHGAPDLPRTKRVELKASSLLSLLVPAPFCGSVWTTVIIIVGW | 255 |
| Nlug_HE_XP_022189933.1 | TSTTSTTSRPTTDSHRSKCEAPDLPRTKRVELKASSLLSLLVPAPFCGSVWTTVIIIVGW | 263 |
| Btac_HE_XP_018895589.1 | QKSPLN-----KTEHSRSPPEMKASSLFSLLVPSPLGKSVWTTIIFIVGW           | 235 |
| Aluc_HE_KAF6204998.1   | RNG-----NSSTAKRRSEIKASSLFSLLVPAPVTGTFWTTVIILVGW              | 204 |
| Ofas_HE_GCXY01041673.1 | I-----DGSEKSRKEIKASSLFSLLVPAPLTGSIWTTVIILVGW                 | 210 |
| Hhal_HE_XP_014287364.1 | I-----GDGVEKKRREIKASSLFSLLVPAPLTGSIWTTVIILVGW                | 170 |

\* \*: \* : : \* \* : \* : . . \* \* : \* : :

|                        |            |     |
|------------------------|------------|-----|
| Clec_HE_XP_014239966.1 | RILTRQR--- | 148 |
| Btac_HE_XP_018898908.1 | VIILSSKNNR | 255 |
| Lstr_HE_RZF36208.1     | KLLMRHNR-- | 263 |
| Nlug_HE_XP_022189933.1 | KLLMRHNR-- | 271 |
| Btac_HE_XP_018895589.1 | RLITRLQ--- | 242 |
| Aluc_HE_KAF6204998.1   | RILSKQR--- | 211 |
| Ofas_HE_GCXY01041673.1 | RILARNR--- | 217 |
| Hhal_HE_XP_014287364.1 | RILARNR--- | 177 |

: : .
