# Supplementary material for: Deep Conservation of Hid-Like RHG Gene Family Homologs in Winged Insects Revealed by “Taxon Hopping” BLAST
Source: MDPI journal article supplement (doi:10.3390/insects12110957), 2021-10-21
Supplement: s1 [file s1]

|                      |                                                                  |           |
|----------------------|------------------------------------------------------------------|-----------|
| Pxyl_L_XP_037962503  | MAIAFNLP SEREASEENFSRLNRLLT EYVLCHILVARQPEF---QERRDRPFSDSDIE     | 57        |
| Hkah_L_XP_026316402  | MAIAFNLP SEREATEENFSRLNRLLAE YEV LCHILVSRQP GQE AQENRRRPFSES DID | 60        |
| Herm_L_XP_021187231  | MAIAFNLP SEREASEENFSRLNRLLA EYVLCHILVSRQP GQEV QDNRRRPYPSES DIP  | 60        |
| Slit_L_XP_022815312  | MAIAFNLP SEREATEENFSRLNRLLA EYVLCHILVSRQP GQEV QENRRRPYPSES DIP  | 60        |
| Sfru_L_XP_035452846  | MAIAFNLP SEREATEENFSRLNRLLA EYVLCHILVSRQP GQEV QENRRRPYPSES DIP  | 60        |
| Atra_L_XP_013186325  | MAIAFNLP SEREATEENFSRLNRLLA EYVLCHILVSRQP GQE AQET RDRPFSESDL D  | 60        |
| Prap_LP_XP_022117210 | MAIAFNLP SEREA AEFNSRLNRLLA EYVLCHILVSRHP GQEV QDNRRDRPYSESDIV   | 60        |
| Zces_LP_XP_032807226 | MAIAFNLP SEREATEENFSRLNRLLA EYVLCHILVSRQP GQEV QDNRRDRPFSES DIE  | 60        |
| Ppol_LP_XP_013147603 | MAIAFNLP SEREATEENFSRLNRLLA EYVLCHILVARQP GQEV QENRRDRPYSESD IE  | 60        |
| Dple_LP_XP_032522380 | MAIAFNLP SERETA EFNSRLNRLLA EYVLCHILVSRQP GQEV QENRRDRPYSESDVE   | 60        |
| Vtem_LP_XP_026497378 | MAIAFNLP SEREA AEFNSRLNRLLA EYVLCHILVSRQP GQE AQENRRRFPYSESD IE  | 60        |
| Bmor_L_ICPK01046969  | MAIAFNLP SEREAADENFSRLNRLLA EYVLCHILVSRQP GE-VQENRRDRPHSDSEL T   | 59        |
| Msex_L_XP_030040660  | MAIAFNLP SEREANDENFSRLNRLLA EYVLCHILVSRQP GE AQESRRRPHSDSE IL    | 60        |
|                      | ***** : ***** : ***** : * :                                      |           |
|                      |                                                                  | * : * : * |

$\star$                        $\star$      $\star$      $\begin{smallmatrix} \star \\ \vdots \\ \star \end{smallmatrix}$                        $\begin{smallmatrix} \star \\ \vdots \\ \star \end{smallmatrix}$                        $\star \star$                        $\begin{smallmatrix} \star \\ \vdots \\ \star \end{smallmatrix}$      $\star \begin{smallmatrix} \star \\ \vdots \\ \star \end{smallmatrix}$                        $\begin{smallmatrix} \star & \star \\ \vdots & \vdots \\ \star & \star \end{smallmatrix}$

|                      |                                                             |     |
|----------------------|-------------------------------------------------------------|-----|
| Pxyl_L_XP_037962503  | SRFGNPRTAGVLLSPRRERRFTFAVTSEKHWRDKGGTREEDAGIPIISDTDEPDAPSPE | 177 |
| Hkah_L_XP_026316402  | --YGSPRTAGVLLNGRSERSFTFSVSSQQRDKGGTDHADGA----HAAYTDDDDAN-   | 167 |
| Herm_L_XP_021187231  | --YGSPRTAGVLLSPRRERTFTFSVTSEKHWRDKGGTDVADGV----SRGDGISDSDSD | 165 |
| Slit_L_XP_022815312  | --YGSPRTAGVLLSPRRERTFSSMTSEKHWRDKGGTDVADGV----TPGELSDAECDR  | 165 |
| Sfru_L_XP_035452846  | --YGSPRTAGVLLSPRRERTFSSMTSEKHWRDKGGTDVADGV----TPDEMSDAECDR  | 165 |
| Atra_L_XP_013186325  | --YGSPRTAGVLLSPRRDRKFTFSVSSEKHWRDKGGTDVADGV----TDADVTDVTS-  | 165 |
| Prap_LP_XP_022117210 | --YGSPRTAGVLLSPRESSFNFSVTSEKHWRDKGGTDVADGV----GDTDETDAAASP- | 165 |
| Zces_LP_XP_038207226 | --YGSPRTAGVLLSPRRDSSFSFL-TSEKHWRDKGGTDVADGI----MDTDVTDALP-  | 164 |
| Ppol_LP_XP_013147603 | --YGSPRTAGLLLSPPRERAFTFSVTSEKHWRDKGGTDVADGV----ASADVTDSSSP- | 165 |
| Dple_LP_XP_032522380 | --YG--RTPAGVLLSPRRERSFTFSVTSEKHWRDKGGTDVADGV----VDEDVTDADP- | 164 |
| Vtem_LP_XP_026497378 | --YG--RSPAGVLLSPRRERSFNFSVTSEKHWRDKGGTDVVDNV----IDADVTDATP- | 164 |
| Bmor_L_ICPK01046969  | --CNSPRTPGGVLFSPRRERKFTFS-SEKHWRDKGGTDVTDGV----SDAETDAGTPD  | 161 |
| Msex_L_XP_030040660  | --YGSNRTAGVLLSPRRERSFTFSSSEKHWRDKGGTDVADGV----TDTDETDASPE   | 165 |

. \*:\*.\*:~. \* : \*.~ \*:~: ~~~~~ :. .

|                      |                                                     |     |
|----------------------|-----------------------------------------------------|-----|
| Pxyl_L_XP_037962503  | -----PSSSPKDSTSSSESSIFSSIMPDKLSGSICTAVLFMLGWKLLANNR | 222 |
| Hkah_L_XP_026316402  | --AASNENQQDERGSSVSSVISSITPYKVSGSICTAILMLGWTILSHKR   | 215 |
| Herm_L_XP_021187231  | RDLDETDAPPT-EKAAETSIFSSIIIPDKLSGSICTAVLFVLGWKLFNSKR | 214 |
| Slit_L_XP_022815312  | DNMDETDAPKAEKEPEGSIFSSIIIPDKLSGSICTAVLFMLGWKLFNSKR  | 215 |
| Sfru_L_XP_035452846  | DILDETDAPKPEEKEPEGSIFSSIIIPDKLSGSICTAVLFMLGWKLFNSK- | 214 |
| Atra_L_XP_013186325  | -----PTSS---EKSEGSISSIIKDKLPGSICTVVLFWMLGWKLLSNKR   | 205 |
| Prap_LP_XP_022117210 | -----DCPND-KRSSESSILSSIMPDSISGSICTAVLFMLGWKLLSNKR   | 208 |
| Zces_LP_XP_038207226 | -----QCTDE-KRSSESWIFSSIIIPDKLSGSICTAVLFMLGWKLLSNKR  | 207 |
| Ppol_LP_XP_013147603 | -----EEPYQPEKSSSESIFSSIIIPDKLSGSICTAVLFMLGWKLLANKR  | 209 |
| Dple_LP_XP_032522380 | -----EPPFAGKKESENSILSPDKLSGSICTAVLFVLGWKLLSNKR      | 208 |
| Vtem_LP_XP_026497378 | -----RLTEKETSSS-ESSIFSILPDKLSGSICTAVLFMLGWKLFNSKR   | 207 |
| Bmor_L_ICPK01046969  | A-----PT-STEPGVTSILTSIIIPDKLSGSICTAVLFMLGWKLFNSKR-  | 202 |
| Msex_L_XP_030040660  | D-----PA-QKD-SSTSIFSSIIIPDKLSGSICTAVLFMLGWKLFNSQR-  | 205 |

: \*\* .: ~~~~~.:~:~\*~:~:~.
